# Supplementary material for: Structure and Phylogeny of Chloroplast and Mitochondrial Genomes of a Chlorophycean Algae Pectinodesmus pectinatus (Scenedesmaceae, Sphaeropleales)
Source: Life (Basel). 2022 Nov 17;12(11):1912. doi: 10.3390/life12111912 (PMC9698225; doi:10.3390/life12111912)
Supplement: Supplementary file 1 [file life-12-01912-s001.zip]

Archive with 9 entries (9 files):
- Figure S1.tif
- Figure S2.tif
- Figure S3.tif
- Figure S4.tif
- Figure S5.pdf
- Table S1.xlsx
- Table S2.xls
- Table S3.xls
- Table S4.xlsx
