# Supplementary material for: Structure and Phylogeny of Chloroplast and Mitochondrial Genomes of a Chlorophycean Algae Pectinodesmus pectinatus (Scenedesmaceae, Sphaeropleales)
Source: Life (Basel). 2022 Nov 17;12(11):1912. doi: 10.3390/life12111912 (PMC9698225; doi:10.3390/life12111912)
Supplement: Supplementary file 1 [file life-12-01912-s001.zip › Table S1.xlsx]

## Sheet: Table S1
Table S1 Information of Organelle Genomes
Mitochondrial genome	Chloroplast genome	Organism	Order	Family	Genus
NC_001638.1	NC_005353.1	Chlamydomonas reinhardtii	Chlamydomonadales;	Chlamydomonadaceae;	Chlamydomonas.
NC_012930.1	NC_016732.1	Dunaliella salina	Chlamydomonadales;	Dunaliellaceae;	Dunaliella.
NC_020437.1	NC_020438.1	Gonium pectorale	Chlamydomonadales;	Volvocaceae;	Gonium.
NC_024755.1	NC_029675.1	Bracteacoccus aerius	Sphaeropleales;	Bracteacoccaceae;	Bracteacoccus.
	NC_028586.1	Bracteacoccus giganteus	Sphaeropleales;	Bracteacoccaceae;	Bracteacoccus.
NC_024756.1	NC_029674.1	Bracteacoccus minor	Sphaeropleales;	Bracteacoccaceae;	Bracteacoccus.
NC_024758.1	NC_029672.1	Chromochloris zofingiensis	Sphaeropleales;	Chromochloridaceae;	Chromochloris.
	NC_034655.1	Hydrodictyon reticulatum	Sphaeropleales;	Hydrodictyaceae;	Hydrodictyon.
	NC_037918.1	Lacunastrum gracillimum	Sphaeropleales;	Hydrodictyaceae;	Lacunastrum.
	NC_037919.1	Pediastrum angulosum	Sphaeropleales;	Hydrodictyaceae;	Pediastrum.
KR026339.1	NC_034654.1	Pediastrum duplex	Sphaeropleales;	Hydrodictyaceae;	Pediastrum.
	NC_037920.1	Pseudopediastrum boryanum	Sphaeropleales;	Hydrodictyaceae;	Pseudopediastrum.
	NC_037921.1	Pseudopediastrum integrum	Sphaeropleales;	Hydrodictyaceae;	Pseudopediastrum.
	NC_037922.1	Pseudopediastrum sp.	Sphaeropleales;	Hydrodictyaceae;	Unclassified
	NC_037923.1	Stauridium tetras	Sphaeropleales;	Hydrodictyaceae;	Stauridium.
NC_024760.1	NC_029671.1	Mychonastes homosphaera	Sphaeropleales;	Mychonastaceae;	Mychonastes.
	NC_028579.1	Mychonastes jurisii	Sphaeropleales;	Mychonastaceae;	Mychonastes.
NC_024757.1	NC_029673.1	Chlorotetraedron incus	Sphaeropleales;	Neochloridaceae;	Chlorotetraedron.
NC_024761.1	NC_029670.1	Neochloris aquatica	Sphaeropleales;	Neochloridaceae;	Neochloris.
NC_024763.1	NC_029669.1	Pseudomuriella schumacherensis	Sphaeropleales;	Pseudomuriellaceae;	Pseudomuriella.
KU145405.1	KX131180.1	Hariotina sp.	Sphaeropleales;	Scenedesmaceae;	Hariotina.
NC_036659.1	NC_036668.1	Pectinodesmus pectinatus	Sphaeropleales;	Scenedesmaceae;	Pectinodesmus.
NC_002254.1	NC_008101.1	Tetradesmus obliquus	Sphaeropleales;	Scenedesmaceae;	Tetradesmus.
	NC_029676.1	Kirchneriella aperta	Sphaeropleales;	Selenastraceae;	Kirchneriella.
NC_024762.1		Ourococcus multisporus	Sphaeropleales;	Selenastraceae;	Ourococcus.
	NC_029735.1	Ankyra judayi	Sphaeropleales;	Sphaeropleaceae;	Ankyra.
KT259054.1		Sphaeropleales sp.	Sphaeropleales;	unclassified	Sphaeropleales.
