# Supplementary material for: Structure and Phylogeny of Chloroplast and Mitochondrial Genomes of a Chlorophycean Algae Pectinodesmus pectinatus (Scenedesmaceae, Sphaeropleales)
Source: Life (Basel). 2022 Nov 17;12(11):1912. doi: 10.3390/life12111912 (PMC9698225; doi:10.3390/life12111912)
Supplement: Supplementary file 1 [file life-12-01912-s001.zip › Table S2.xls]

## Sheet: TableS2 summary of Gene feature
NO.	Gene/element	OneLetterCode	From	To	Size	GC_Percent	Strand	No. of AA	InferredInitiationCoden	InferredTermination	Anti-Coden	IntergenicNucleotides	InterveningSequence
1	psbC		1	63	1386	0.4019	L	461	GTG	TAG		1164	GAGTAATACCTCTAGGAGGAATACAAAATCTAAAACAATTGAATCATAGCAATCTTCAAAAAAAGAGTTTGTCTTTGTGTTTGAAAAAAGAAAATTTTTTTTTAAATAAAGAAATATTTTAATTTGAAACAGAAGAGAATTTGATTATCTTCAAAAAGTCAAAGCAAAGTTTTATACTCTTTCATTTTTTAATTGACAATTTTCATTGTCAATCAAAATTTATAATTTTAGAGTTAAAAAAAAACAAGAAAAAGAATAAAGAAATAAAGAGTCAAAAAAATTTTTATTTGCCAAAAAACTTTTTGCAGTGCAAACTCTGTTTGCAGTTTTTACCTTTTGGTAAAAACCAAAAGGCAAATGCAGAAAGTTTTTTTGACAACAACAAAAAGTTACAACAAA…
			192474	192811
			193105	193176
			194400	194493
			195991	196809
2	atpF		1228	1764	537	0.2905	L	178	ATG	TAA		668	AATAAGAAAAAAAATGAATTGACTGGAATAAAAAAGATAATTTTTGGATATTCTAAAGAAATCAAAAAATTGTTCAAAAAAATGAGAAATTGATATTCTTCGTTGAATTTCTTCGAAACCCTTCGTTCACGTATTCTTTTTCTCTTTTTTTGTAGTTTTCAACCTTTGTGTAAGTACTACTTACACAAAGGTTGAAAACTACAAAAAAAGAGAAAAAGAATCTAACTGACCAAAGAAGAAAAAACAAAATCTAAAATTTTTTCTTTATTCCAATATCCGTAAAAAAGCTTCTATTTTTTAGAAAATTTTGAAAGAAAATAGAAATTAAAAAATAGAGCAAACTCCACTTACTGTGGAACCCTTTGAAGGGCGGACAATATACAAAATTCTCTAACAAAA…
3	atpH		2433	2681	249	0.4056	L	82	ATG	TAA		240	ATTTATTTCCTCCGAAAAATAATCAGTAAAATTATAACAACCAATTCTATTATATTATATTTTTCTAAAAATGGCAAAAAAAAGAAAGAATAAATTAAAAAATAATTTTTCTTCATTTTTAAGCTTTTGATTCTATTTTTTTTTGAAACTACGAGGTCAAAGGCTAGTGACAAGCATAGTAAAGGATATCCCATAATTCCAAAAAAAAATAAAAGTAAAAAATAAAATTTTTTTTGTTTT
4	ftsH		2922	14255	11334	0.2776	L	3777	ATG	TAA		299	GAGTTAAACGAAATAATGTCTTTGACAAATAAAAAAATTATTTATCAATAAAAAGCATGCGCTTTCTATCAAACTTTTTTTGTGAAAAAAAAAACAAAACTACTTCTCTTGGAGAGAAGATTTCATCATCTAAATGAATTCCTTTTTTTTGAAAAGAACCAAAAAAGAATTTTTTAGAACTTTTTTGAAAAAAAAATTTTCTATTTTTAGAGTTTGATAGAAATAGAGAATAAAATTTATTAATTTTTCATAAAAATACTAATAAATTTGTTAAAAACAAGAAATTATCTTTGTTTTTA
5	tRNA-Thr	T	14555	14627	73	0.4521	L				TGT	879	ATTTCATAAGCTAATTTAGATAAATAGCTATTCCTTTTTTTTTTATAAATTTTAGAAATTTGTAAAGGAAACTTTAAAAAATTATACAAAATTTTTTAAAAAAAGTCAAAATCAATCCTATTGAAATTAAAAAAATTTCTAAATTTTATATATATATATATCTAGACAAGACAAACAACAAATTTTAAAAAAGGAGAATATTCTTCTTTCTCTACTTTGTAAACAATTTCTTTTTTTTTTAAAGGCAAGAAAGAAGTAAACTCCACTAAAAAGAAGTATGTTTTGGTTGTTTTCCATTTTATTTGTCTTTCTTTTGAGTAGACGCTTTTTCTTCAAATAAATAAATAAAGAAAAAGCGTCTACTCAAAAGAAAGACAAATAAAATAGAAAAAACTGTTT…
6	rpoC2		15507	23951	8445	0.2812	L	2814	ATG	TAA		1618	TCTATTTTTGATATTTGTTCAAAAAAAAAATAACTTTTTTACTCTTGATCTTTGTTCTAGAGGTTTGGTTATTTTGTACAAAAAGGTTGGTTTTTATTCTTTTATTCTCTATCTCATTTTTACTGTTTTATTGAAAAATATTTTCTTCTTTTTTGTGCCTCTTTTTTTTGTTTGGTTCAACCTTTGTGTAATACTTAGGCAGAAAGTTGAACCAAACAAAAAAAAAGAGGCACAAAAAAGAAGAAAACACAATAAAAAGAAGCAGCTTTTTTGTTTTTTCTAATATTTAAAGCAAATAGTTTTTGAACGATAGAAAAAGATAGACATAAGCAAAAATGACTTGTGCAAATACTTTTTAACTGGTCAATTCAAAAAATGGTTTAAAGTATTATTACCGTG…
7	rps3		25570	27672	2103	0.2696	L	700	ATG	TAA		1152	ATTTTTTTTTTTAAATCTTTTTTTAAAAAATTATCTTTTTTACACTTTCCATAATTTGAGGAAAAATTCTTTTTTGAGTACTTTGAAATCAAACAAAAAAAGAAGAAAAGGCTCCTCTTGTTTCAGTTGTCGTCAGTTTTTCTTGCATACAAAAAAGAAGACAAAAAAAAGATTCTCCAAAAAGGTGAAAAAATGTACGTGAGAATAAAAAGAAAAGAGCTTTTTGGTCGATAAAAAATGCAAGCTTCGAGCAAAAAACAACAAGTCTTTTATTTTCTTTTGCTGCTTTCCAAGAAAATACTAAAAAACTCAACAAAATTGCAAGAAATATAAAAAAGAAAGGAAATGTTCTTTCTTTTTAATTACACAACAAAGAAGAAAAAGTTTTCTTGAAATAAA…
8	chlN		28825	30375	1551	0.3308	L	516	ATG	TAG		1660	TTTGTATGGACTCTTTCTATACTTCTTATTCTTTTCTGAAATTAAAAAAAATTCTATACCTTTGAATACCCTTCAATACTAAAGAGAACAAAAAAATTTTCTTCACTTTCATAAAAATTCAAACACTGCAAATTAAAATTTCTATTTTTTGATCCTTTTGTTCTTTTTTTTTTTGTGTTTTCAGACTTAGTGCCTGTAATACAGGCACTAAGTCTGAAAACACAAAATAAAGAGTCAAGGCTTGCAGTTTTTACCTTTTGGTGGAAACCAAAAAGGTAAAAACAAACAACAAACAAAGTTTATTGTAGCTTTTTGTGTTTCTTCTTTTTTTTTGCATTCAACCCAAGTGTCTGTAGTACAGATCACGAAGGTTGAATGCAAAAAAAAAAGAGCAAAAAG…
9	rpoBb		32036	33781	1746	0.3167	L	581	ATG	TAA		654	AAAAAATTTTTAAAAAACATTTCAAATGAGGAATGAGAAAAAATCAAAACTCCGATTTTTTGTTTTTTGAAATCTTTTCTTTTTTTCTTTGTTTGTTTTTTGAACACGCTTCGCTTTTGCAAACAAAGAAAAAAAAGGAAATAAAAAATTCATGAAGATTTCACTTATCTTTGTATAAAATGAAATTTAATAAAAAACTTCTTTTTATATTTTATGAACATTGCAGATTTTTTTGTTTGCGAAAAATTGAAATAGAAAAAAATTTTTTTTGAATTGTAAAACTTAAAAAAGTCAAATAAAAAAGAATCTTTGTAAAACAATCAAAAAAAAATATTTCTTTCTTTTGCCAAAAAAACAGAAATTTTCTGTTCAAGACTTGCACTCTTTGAAAAATTTTTT…
10	rpoBa		34436	36514	2079	0.3059	L	692	ATG	TAA		1155	AAAAATTGTATTTTTTTGAATTTGTAAAATTTGCTCTGATTCTATCAAAAAGAACGAATACAGACTCTTTCGCACCAAAAAATTTATGAATTCTTCGTTTGTTTCTTTTTTTGTTGGGTCAAAAAAAAAGAAACAAACGGAGGCTTTGAATTTTTATTCAAAAAACTGAATAAAGATAAAAGCTTTTTGCAAACAACAAACTTTGTTTGTTGTAGCTTTTTGCTCTTTTTTATACTTTATTATATTTCTTTTTTATAAATATAAAAAAAGAAAGCACTGTTTTTTTTAAATGTTGAAACTTTTTTTTAATCTTTCAATAATTTCTCTTTTATGATATAATGAATAAAAATAAATAGATTTCTATTTTTTCACATTTTCTTCAAAAATAGACTTTTGTTG…
11	psbF		37670	37804	135	0.3407	H	44	ATG	TAA		678	TTTTCTTTCTTCTAAACTCTTTTCTTTTAAGGTTTAGTAAAGTGAAAGAAACATTTTTTAAATTTTTAAATATTCAGTTTCGAATCAATTGAGAATTTCTTAAAAAAAATGTTTAATCTTTTTTTTATTTTTCTTTTTTTTATTCCACAAAAAAGGTTTTTCGGACCCTTTTTGCATCAGAAAAACGTTTGTACCAAATTTTTGTTGACAAAAAAAGAAGAAACGAAAAAAGCGGCCTTTGGTCAAAGAGAAAAAGACTATGTCCTTTTTTGTTGTTTTGTGCAAACAACAAACAAAATTTGTTATAGCTTTTTGTTTTCCACAAAAAAACTTTCTGCATTTGCAGAAAGCTGCTGCAAACAGAGTTTGGGCTTCTTTTCTCTAACACCCAAGAATAAA…
12	psbL		38483	38599	117	0.3077	H	38	ATG	TAG		1223	TAAATTGTTTGCTTTCGGCCAAAATTTTTGTTTGGGTCCTTTAGACAAGTTTTTAAAAATCTTCAAAGATTTTTAAAAAGTGAAGAACTTTTCATTTTTCTTAGAAAAATGAAAAAACAAACAAAAAGAAAGAAAACTTTTTTAGAACAATGAATGAGGAATTTTTCTTTTTGGTCAAAAAACACTTTTTTTTTCATCTTAAACAAACTTGTTTTCAGACAAAAAAAGAAAGAATCAAAAAGGAAAAACCTATCATAAAATTCATGCCAAAAAAAATTTCTCTATTTTTTTCACTGAACTATTGTTTGATTTTTTGTCAAACAAAAAAAATATCTTTTATTTGATCAGCCTGAAAACTTTCTTATTTAAAAGAAAAAACTTTTAAAACGAAAAAGAAAG…
13	petG		39823	39936	114	0.3947	H	37	ATG	TAA		966	ATAATAAATAAATATTGGCAACAAAGATACAATTATTTATTTGTATCTTTGTTGCCAATATTTTATTTCCACAAATGCTAAAAAAATATTTTTTTTCCTTTTTTCTAACTTTTTATTAAATAAAAAAAGTTAGATTTCAAAATCAATTATTGTCTAAAAACGATAAATTTTTGTTTTTTTTTCTTGAATCGCTCTCAAAGGTAGATGAGCAAGTTAAAGAAGTTTTTTCTCAGTTCAAAAAAAGAATTGTAAATCTGTTGGTTACTACTTTTCTTTATTTCATTTTTTTAAATTGGAAAAAAGCTTCCTGTTCTTTTCACGGAACTCCTTTTTAAAAGAGCACTTTATTCTACTATATTTGCAATCATTTTTTGTTAAACAAAAAAACTTTCTGCATTT…
14	rps12		40903	41295	393	0.3537	L	130	ATG	TAG		1021	TTTTTTATTTCGAATAAGTATTAAAAGAAAAAATAAAACCAACTTTTATTGATTTTCTATTTTTTATTGAATTTTTTACTTTTTTTGAATCTTTGTTTCCATTGTATACCTTTTCATTTTTTTAAATCTTTTTTGATTGGCTTCAAGAAAGGTTTTCACGGGTACTATTTTTTCAAAGAATTCCTTCTTTATGTTTTAAAAAAAAGAAAAAGAATCAAAAATACTTCAAATGAACATTCAAGAGTTCTTTTTCATAGTTTCATTTTTTTCATTCCTTCAAATAGAGGAAAACAAAATTCTTGAAAAATTGCTACTTTTGATTTCATGGCTATTTCAAAAGGAAAATAGCCAAACAAAGGATTGAAAAAGAACAGCAACAAAAGAAAAAGTTCAATTCTA…
15	psaJ		42317	42442	126	0.3016	L	41	ATG	TAA		510	AAAAATTCTTTATTTTGATTGTTTCAAGAAAAAAAATGAAAAAATATCTTCATTTTTTAATTCTGCAAAAACTTTTTTTTTACCTCAACTCTCTGTTGAATTTCTTTTAGTTGTACCCAAAAGAAATTCAATAGCTGTTCGAAGCTCATTTTGTTTCAGCTACAACTGAAAAAAAAGTCTTTCGATAAATTTGAGTCAAAAAGAAAGATTCTAAAAAAAAAATTTTTGAAACGTAAAACTTGAAACACTTTTCTTTCTTGGTTGATTTTGCTCAATACTTGTAAATGTCATTCTATTTTCATAGACATAGAGCTTTCTTTTTTTCGTTTTGGTTACGTATTTTATCTTTTTCTGTATGAATTAACGGTGAAAAGAGCATACTGGAAAAAGGGAGTGAAT…
16	atpI		42953	43684	732	0.3183	L	243	ATG	TAA		1047	AAATTTTTGAAAAACTATTTTTTAATATTTTAAAAATTGAATAAATCGACCCCTTCAATATTTCTTTGAGAAGAGAAAATTTATTCTTTATTAACAACCAAAATAAAATTACTTTTTTTCATTTTTTTGAATCCTCTTTTCTTTAGAATTTTCATTTCAAAAGAAAGACTATAGAAAAAGAACACAAAAAAGAAACATTTCATTTTTTAAAAAATGAAGAAAAAGGTTTTATTTCTATAGAATGAATTAATTCTTTTTCGAATTTGTAAAAACAAAAAATATCTCTTTCAAATGGCTCGAAAGAGGAAAAACAAAATTCACTAAGAAACGAGAAACTATTTGTGCTTTCATTTTAAAGATTCAGAAAAAATGACTGTTTCATTCTAAAAAAGTAAGAAT…
17	psbJ		44732	44860	129	0.3798	L	42	ATG	TAA		2074	AAGAAAAATTATTTTGTATGTATATAGATAAAATCAAGAAAAATTTAAAATTCACTGAAAAAAAAATTCTCAGTTTTTTAAAAACAAAGAAAAAATTTTCTTTTTTCTTGGGAATCTAAAACTTCTAAAGAATAAATTTTTTAGAAAATATTCTAAAAACAAAACCGCATTTTTATTTTTTTTATTCATGTATCTTTTATTTCAGTTATTTTTTTAATTTACAAAGTAAAAAAAAATTTCTTTTTGCTTTTTTTTGGCCATTTCAACACAATCCACCATATCAAAAAGATTGATAGAGATATAGTTTTGACAAAGATAACTCAAAAAAAAGCCTAGAAGCAAATGACCTGAGAAGTACAACAGCTACTACTCAAAAAATAAAATCTTCTCAAAAACACT…
18	psbD		46935	47996	1062	0.3964	L	353	ATG	TAA		218	TGCGTGATCTCCAAAATAATTTTATAGAGTTCATCTTTACGTAAAAAAAATTTTTTTAAAACCTATTTGTAATTTTTATTATACCATAATTCTAAATTTATCAAAATATTCATGAAGAAAAAAAATTTTTTCTTTTTAGTCGTTTTTTTTTGAAAAAAAAAAATTCTCCTTCATTAAACAATTCTGCTCTTCCGTAAGAGTCATAAAAAATAATTATT
19	tRNA-Ser	S	48215	48301	87	0.5517	L				TGA	528	TACTCATAGCTTTTTTATTATAACAATTATTATTTAAGAAAATCAACTATAAAATTTTTGTTTGCTCCACTTTTTTATTTTTTTTTCTGAAGATAAATAATTTTTGTTCACTGTAAAAAAAGAACAAAGAATGAAAAAATGAATACAAAAAAATTTTTATTTTTTTGTGCTGACCCTAAGTGTATGTAGAACTTACACTTAGGGTCAGCACAAAAAAGGGTACAAACTTTGATTTTTTTTGTATTTTCTTTTTTTAGTACATTTATTTTTTTATGAAAAAAAGAGCATGTATTACACATATTAAGGTTGCTTCTTTTTTGTATTTTTTCAATTTATGTCTGTACTATACAGATACCAAAGTATAAAGCAGACAAACAGACAAAAAGGAAGTAACAAAAA…
20	atpE		48830	49240	411	0.3163	L	136	ATG	TAA		497	ATAAAATAAAGCTTCATTTACTTGCTCAGAGTCAGATTTGTACGTAATTTTTCCTTCGCATTTGTTCATACATTCGTTAGAGTTCTGTGATTTTTTGCATCTTTTATTTGCTCTTTTTTTTGTGTTTTCAAACTTCGTATCCGTATTCCAGATACGAAGTTTGAAAACACAAAAAAAACAAGCAGTTTGTTCTTCAATTTGCTCAGCCTATTGATGAAGGAAACAAAGCAACAGCTCAAAACACACTCCGTATTCATTCTTTTCATCCTGTTTTCTTTTTTCAAATAGACCGCTTTTTTAAAAGAAAAAAATATTTTCAAACAAAGGAAAGAAAAGCTTTTCTTTGTTTTCTTCGTTTTTATGATTTTTGAGACATAGTGCCTGTACAAAAAAAATCTT…
21	rps7		49738	50238	501	0.3214	L	166	ATG	TAA		147	AGATTTTGATTTAAGAATTTTTTGATTTTTCATATTTTTTACACCAAATAGACAAAAAAACTTTCTGCATTTGCCTTTTGTTCTTTTTTTTGTTTTTACCAAAAGGTAAAAACAAAAAGGTAAAAAGGATTTTTAAAATTTTTTTTA
22	tRNA-Asp	D	50386	50459	74	0.5676	L				GTC	1125	TTCTTCTTTTGAAGCTTTGTGCCAGTTCCAATTTTAAGAATTGAAAGAGAAAAAACAGCATGAAATATTGTATAGAAAAAATGAAAAATACATTTTTTTTAATGTATTTGTTTACAGAGACAAATACATTCTTTTTATTCAATTGCACTACATTTATTCTAACCAATTTCAAACATTTTTGCAAGTTTTTTGAACTTTAAATGGAGGCCTGAAAGTTTCATTTTTTTATTCTCAAAAAAATATTTTTTTTCTTTTTTTATCTTGACCATAACTTTTGAAAAACAATGAAATATTGAATACACTTTAGTCTTTTTTAACTATTGCTGTTATTCTTTATGTATATAATGGAAAGTCAAGAAAGAAAAAAAGAAGAAAGGTTTTTTTCTTCATTTTCTATAA…
23	psaA		51585	52238	1989	0.3846	L	662	ATG	TAA		366	AGTTTGGTAAAGAAGAAGATCTCTTTTTTTGAAGATATGTTTTTTTAAACATGTTTTCTCAAAAATGAAAAAACATAAAACTCTAAAAAATTTTATTTTTTAGAAAAAACAAAAAAAATCTTTTAAAAAAATATAGACTTTCAACTTCCCTGAAAATCCGTACATGCAATTTAACATTGCATACGGCTTACGTTCGTGAAAATAATTTTTTCTAGCCAAGAAGGCTTTTAGATTTGTTGCAAATAAAGTTTGCAACAAAAAGATTGCTATTTTTTAGCAAGATGTTTCCATTTTTTTTGGAAATAGAAAGAACTTTAAAATAGACAAAAGAAAAATAACTTTATTTGTGTTTATAATATTTTGAAT
			53655	54282
			56025	56731
24	tRNA-Lys	K	57098	57169	72	0.4444	L				TTT	970	TTTTTTCATTTTAGCGAACAACAAACTTTGTTTGTTATAGCTTTTTGTTAAAAACAAAAAGTTTTTCTTTTCTCTTATTTACAAAGAAAAAGAAGAAGATTTCTTTTTATTCTTTAAAAGAAATTTTCATAGTTTGAATGAAATCTAAAACTCTTTTATTTTAACTTTTTATTTGTTTAAATAAAAAAACAAAAGGAAATAGAAAGAGTTAAAAAAATCTATTCTGAAATGAAGTTTTTATCATCTGTAAATCTTAAAAAATATAATAACAAAACTTTTTTGTTTTTTCAATATTTGTATTCTCTTTTGTTGTTCATTTTTTACAAGAAAAAAGTATTTCTTTTTCTATGAAAGTTTACACTTGGCTTGAACAAAAAAAAAATTCAAAGTTTGCAGAAG…
25	ycf12		58140	58241	102	0.3529	L	33	ATG	TAA		861	AAAAAATCATAATTATAATTTTAAAAGAAAAACAATCAAAACAGTAAAAGATTCTCTGAAAAAACAAAAAAATTTATTCTTTTTTTTTCAAAAAGAAAATTCTAAAAACGAAAAAAATAAAAACTTCAATAAAATAAAAAGAAATTTCTGTTTTCAATAAAATTTTGTTTCTTGCATTATCTTTGAAATATTCATTTTTTTAAATAATAACATTTTCTTTTTTTTTGTACAAATTTGTATAAAAAATGAAAAGGTTCATTTGTTTTCAATCTTCTTTTTTTGTTTGAAAAGTTTTGAGTTTCTTCTCAAATACAATTTGTCAAAAGTATAAACTTTGTTTATAGTTTAAACAAAGTTTATTTGAAAAAAATAGAAAATAAAATTTTATCTTTGTTTTTA…
26	chlB		59103	59902	1599	0.3227	L	532	ATG	TAA		395	ATTTTTTATGTTTTTATTTTTTAAGAATTTATAATTCAAACTATAAATTGTATTTTATCATAAAAAAAAATTTTTCTATAGATGAAACTAGACTTTTTGTTTTAACCTTTAGTTTTGTATCTCTCTTTTTTAAGTCCATTTTTTGCAGCAAGAGCTCTGTTTGCAGTTTTTACCTTTTGGTAAAAAAAAAGGCAGCTTTCTGTTTTTACCTTTTGGTAAAAACCAAAAGGCAAATGCAGAAAGTTTCTTTCCTCCTCTATACAGCTGAACATGCAAAAAATGAAAAAAGTATTGCAAAAAAAAATTTAAAAAAAGTTTCGAAATAAATGAAATTTGACAAAGAAAAACCTATAAAGTAATATAGAAAAAGAAATATTAAAAAAAAATAAAAAAAG
			59951	60749
27	tRNA-Met	M	61145	61218	74	0.5405	H				CAT	228	TATTAATAAAAAGAGTGTTTTTTGAACTCTTGGATTTTTTTCTTTGTTTGGTTAACCTTTATTTAGTGTCTATGAGGCATAAAAGCATAACCAAACGAAAAAAGGATCAAGAAAAAAAAGAAGAAACACAAAAAAAAAGAACAAAAGGCACAAAGAAAAGAATGAACGTAAACCAGCATTTTATTGAAATTCTCAATCTTCTTTTGAATTTATTTAGAAATAATAAAT
28	psaC		61447	61692	246	0.3659	H	81	ATG	TAA		208	TTTGAATAAAAATTTTTTGTAATTTTTGTTCAGATGTTAGAAAAGCAATAAAAATAAAAAAGTCATAAATTTTTTTTTTCGCTTCTTCCTTCCTTCTTTTTCATTCACTATGTTTTTTCTATTTGTTCTATTATATAGAGAGCTAAAAAGATAAAAATACAGTGAATGAAAAAGAAAGTGAATCTTAAAATTTTCATTCATACATTTT
29	petL		61901	61999	99	0.2424	H	32	ATG	TAA		453	TCTAAAAACGAAGAAAGCTTTTTTTTTGTTTTTGCTGTTTTTTTATTTAACCCAAGTGTTTTAGTAATACTTACACTTGGGTTAAATAAAAAAAAGAAGCAGCAGCTTTGTGTGAAAAAAACTTTTTTTTACTTTTTTTGCATTTGAGCTTCGTATTTATAGTATAAACACTTGGATTTTTTTATTTTTTGGCTTTTTTCAAAAGGCATGGAAAAAAAAGAACCTAAAAGTAACTCTTTCAAAGAGTTTGATGGAACAGAAAAAAAGAAGAAACTGAAAAGTTTTTTTATTTAATCTTCTAGCAACTTATTTAGACAAAACCCAAATGAATTTAAGGATCCTAAAAAAAAGGATAAAAATTTTTTAAAGATATTGATTCTCAAAAAAAACAATGTTAAA…
30	tRNA-Asn	N	62453	62524	72	0.5694	H				GTT	650	ATAAACTATAATTAAGAAAAACCAGAAAATAATCCGTACTATGAATAAAATCGAACTGAAGAGCGCTAAGACGTTTACGAAGGAGAAAAAGATATTCTTCTTTCTAAAGAATATTCTTTCTTTTTTTTTTTGCCACTCTATCCACACAATTTGTGAATGCCTTCACAAGAAAAAGATATAAAAGAACAAAATATTTCTTTTTGGTTCATTTGCAACTCCTAAAAAATAGAGTTTAACAGGAAGCCAACTTGGTCAAAAAAATTTGTGTTTTTTAGTTCTTGGAAAAAAAGGCTGGCAATTTTGTTTTCTTCTTTATTTTCTTCTTTTTTTTTGCATTCAACCCAAGTGTCTGTTGTATAGATCACGACGAAGGTTGAATGCAAAAAAAAAAAGCAAAAA…
31	rps2		63175	65967	2793	0.256	H	930	ATG	TAA		727	AAAAAGATTTTAACTTTTTTATCTTTTTTTTTCATTTGTTGGCTGTTCTTCATTTCCAGCCCATCAAACAGGGGACAAACACAACAACCAACAATCGGCTTTTTTTTGTCTTTTTGTTTTTACCAAAAAGTAACAACAAAAAGACAAAAAATGTTTTGCCTTAAGCAACTTTTTGGAATGCTTTCTTTCGAAAATTTTTTTCCATTTTCTTTCATTTCTTTTTTTGTAAACTCTTGGAAAAAAAGACACTACTGAAAAAACAAACGTACATTTTTTATGATTTGAAAAATCATAAAAAAGCTTTGATTTTCCAAATTCAAAAACAAAGTTTTTTTGTTCAACTATTCTTATGAGGTTGCTTTTCAATTACAAAAAAAAGGAATAAATTTCAACCAAAGC…
32	infA		66695	67000	306	0.281	H	101	ATG	TAA		2736	TTTTTATTCTTTTTTTGTTTCAAACTTAGTGTCTAGAATAGAGCCACTTTGATTCTTTTTTTGTTTGATTTAATGTTAGCGTGTAAGTATTACTTCTACAAAGGTATATTCTTTTTTTGTTTTCAAACTTTTGTTTGTACTACAGACACGAAGTTTGAAAATAAAAAAAAAAGCAAACAAAAAAGAAACACAAAAAAAACAAAAAAGTACACAAATTGTTGGCTTTGAATTGTTTGGTAGCTCTTTTAGCCCACAATTTGTAGACGAAACACTTGGATTAAACAAATTCAATAAACCTTGGTTATATACCAAGCAAAATGGAAATTTTGAATATATTCAATTTCCAGAAAATGAATTATGGGGATTTTAAAGGTATTAATAACTTTGAAATCCCCATAA…
33	psbB		69737	71263	1527	0.389	H	508	ATG	TAA		844	TTTGTTTTTTTTATTTTTTAGGTTTTTTATATTTTTTGGGAATTAAAGTGCACTTTTGTTTTGTCCAGCGCTTCTTTTTTTTGTGTTTTCATACTTAGTGCCTGTATTACAGGCACTAAGTATGAAAACACAAAAAAAAGAAGCGCTGGAGCCAAATAAAGAGTGAATTCAAAAGAAGAAAACCTAAGGAAAAAAGATTTTTTATTCTATCTTTTTATGTCTTTCAAAAAATTGAAAGACATAAAAAGATAGAATAAAAAATTTTGAAAAAAAACCTTTTTTTTACTCTTTTCTTGTATCTTCTAAATACTAATATATGTTTAAATATAAAACTATTTCGATTTTGCAACAAACTCAAAAGAGTGATGAAAGGACCAAAAAAACAATGCAAAGAAACAA…
34	psbT		72108	72203	96	0.2813	H	31	ATG	TAA		321	TTGAAATTTAGCTTTTTTTGACTGGATGAAAGAAAAATTTTTTTCCTTCATCCAGTCACTCTAAATGTTCTTTGAAATTTTCTTTTTTTTTTAAGAAGGTTTGATTCATATTTTTGTGATTGAGTGATACCTTACAACCACAAAAAAAATGAAGAAGAGAAAACAAATCTTTGTTTTCAGTTGCTGTTTTACAGTTTCAAAAAAGATCTTTCTTTTTTCATTTTTAAAAACAAAGAGAAACTGACACTTTCAAAAAAGAGTTCAAAAAGTATGAGTTCTTTTAAAAACTCATACTTTAAAAAAGTTTCTTTTTAAGAATTT
35	psbN		72525	72659	135	0.3037	L	44	ATG	TAA		93	AATTCTTTCTATTTTTACAAATTTTTTCAAATTTATTCTCCAATAATTATATTACGACAGAAAGTAAAAAAAATCAAAATTTATTCAAAAACA
36	psbH		72753	73013	261	0.318	H	86	ATG	TAA		1424	TTCAACTATTCTTTTTGTACTTTTCTTCGAATAAAAAATGTCAAAAGTCTTGACGCAGTCAAGATTTTTCTCTGTTAGTCTTTGAATAAGCAAAATCAAAAATATTGACTGTGTCCTTATTCTTCACTTGAATGATTCAAAGAAAAGTGTCTATTTGAAGAAAAACTTTTTGCAGCGCAAACTCTTTTTGCAGTTTTTACCTTTTGGTAAAAACCAAAAGGCAGTTTTCTGTTTTTACCTTTTGGTAAAAACCAAAAGACAAATGCAGAAAGTTTTTTTGATAAAAACAAAAAGCAACAACAAACTTTGTTTGTTGTTTACAGAATGAAAAAGCTTCATTTTGTTTTTCTATATTCAAAAACAAAAGTTCGTTTTCATTTTTTCATTTTTTTGCTTTTT…
37	psbK		74438	74578	141	0.2979	H	46	ATG	TAA		1459	AAACTTTTGTGTTTTCTTTTTTGTGGCCTTTAGCCACCTTTTTTTATCCTCTAACCACTCTAGGTTCCTAGAGTGGTTAGAGGATAAAAAAAAAGAAGACTGAAAAATGTTTTTTTGTCGCCATTTTAAAAAAAGAAAACTAGAAAAGAAAGAACAAAAACTTTAAAAACAAAAAATAACTACTCCCAACTATTTTTATACTTTTCATTAACAATTTTAGCTCTAATGTTCGCGAAAATTGTTTTCAACAATAAGCTTTTTCATTTTGGAAAAAAAATTTTTCTCTATTTTCATTTTTAAATACTTTTTGACATTCGAGTTTATTTGGTTGTTTTTTATTCACTTCTGCAGCTAAAATATGAAAAGCAGGAATAAAGAGTTAAAAGATGTCAAAATGAA…
38	rpl20		76038	76382	345	0.3188	L	114	ATG	TAA		691	TGAGAAATTTTTGAAACAGGTTATATTTAAAAAACTTTATAAGTTTTTTGTTCTTTTTCTTTAAATTTTCAAGATTTTTTTCCTTGAGTTTTAAGATTAAAAGAAAAAACAAAAAAAGAATACAAACCTATAAAGAAATTGAAAACAAATTTTTTGTGTGATAGTTTTTTCTTTTTTGCATTCTTCTCTTTCCTCTTCAATGATAAAGAGAAATCTTTTTTGTGTATGCTTTCATTTTCTTTTTGAACGAATTCATTCAAAAGAAAATGAAAGCATACACAAAAAAGCAGAAAACAATGCTTTAAAAGTTTTAAAATGAAAAAAGCAAAAATAAACCAATAGAATGAAGTTTTGCGTAAAACCAAAAATGAAGAAAACATGTGAAAAAAACAAAGAAAT…
39	rbcL		77074	77533	1431	0.4088	H	476	ATG	TAA		445	TTTTTTATGCTTTCAGCATATTTTTTAAACTTTTAAGCATAAAAGTGAAATGAATACTCTTTATTGATTTGCTTTTATGCTTTTTTTATTGAAAGTTTTTAGAAAAGATTCAAATCTTTTCTAAAAACTTTTTTTCTTTTATCCCAATTATGTTGTTCAATTTTTAAAAATTGAACAATATTTCAAAACTTTTTTCTATAAAAATCTTTTTCTCTTTTTTTGTTGTCTTCAACCTTAGTGTAAGTAGTACTTACACTAAGGTTGAAGACAACAAAAAAAGAGAAAAAAGAAATGGTTTTGGCAGTCCTTTGTTTGGCAGAGGTTTTCTCTTATCAAAAACAAAGAGAAATTTGTGCTTTGATTTTTTCTTGAAAGAAACCACATTCAAAAATATCGACA…
			79455	79694
			81485	82215
40	rps11		82661	83053	393	0.3791	L	130	ATG	TAA		898	ATAAAAATTGTAAGAAAAAACTTTTTTAATCTTTTCACTTTTTTCTTTGTGCCTTTTGTTCTTTTTTTTGTGTTTTCATACTTAGTGCCTGTATTACAGGCACTAAGTATGAAAACACAAAAAAAAAGAAGAGTCAAAGTTTGTAGTTTTTACCAAATGGTAAAAAGCTACAGCAAACAAAACTTGTTGTTGTTTTTTTTTGTTTAAAAAAAAACTTTCTGCATTTGTTTTTTGGTTTTTACCAAAAGGTAAAAACTGCAAACAGAGTTTGCGCTGCAAAAAGTTTTTTTAGACACAAAATATAGTTTCTTTCTTCTATTTTACACAAGTAATACAGGTGTTTCGATGACAAAATACTCTATTTTTGAGAATTGCTTTTTTTTTTGAATGTACGCATGA…
41	tRNA-Tyr	Y	83952	84033	82	0.5488	L				GTA	835	AGTTCAATTTATAGAAATTATAAATTCTTAAAAACTATATTAGCAAAATTCATCACAAATTTCAACCATTCAAAAAGAAAAATTTTTAATAAAAAAGAGTGTTCTTTTTTTTCTTTATTCAAAAAAAATACTTCTGATGAAAAATATATTCATCATTTTGTTTTCTCTTGTTTATTGTTTTTTCATAAATTTAAGAACAATTTTTTTTTGAGTATTCATTTCTCAAAACAGGGTGGAGTCCTTTAGACAAAAAACAAATTGAACATGTAAAAAGCAAAAATTAAAGAAAATATATTTTTCTTTGTTTAAGTTTTCCTTAAAGTGACAAGAAAAACTTTTTGTTTTTAACAAAAAACAAACGCTTACCAAACAAAGTCCTTTCTTCTTTTTTGTTGAATA…
42	psbA		84869	85299	1065	0.4113	L	354	ATG	TAA		2523	ATTAGAAAATAATAAAAAAATATAAATTCTCCGAATCTTTGAAAGATTATTCATGAACTCAAAAGAATTCTTGTTAATGACTAACATAACATATCTTCTTATTTTGTCAAATCAATCCCTTTTTTCATATTCGACGGAACAACAGATCCTAAAAACGGAAAATTCAAGTCGGGGTATGAAACCCAGGAAGGCGCAATATGTCCTTCTTGGATATGCCTACACAGAATGTAACCGCTAAATAGGTTACTCTCATTGTGCAAGTGAGAAAACCAATGACTTACCCAAAACCATAAAAAGGGCTCCCAAGGGAGAGGTGAAAGCCTGAGGGGACTATAGCACGTCATTAAATCTCCTTAAACATTATTCTGAGAATAGACGGTAATAAGACTAAGAAATAAA…
			88121	88193
			89673	89719
			91024	91114
			92328	92355
			93876	93991
			95316	95420
			95726	95899
43	tRNA-His	H	98423	98494	72	0.6111	L				GTG	6467	CATAAAGATCGATCATTCATTGTTTTATTAGCTCTTTTCCAAAGTTTTGGATGAAGGAAAAACAGGTTAGTCCTTTGAGTGAGCTACTTTGCAAAGACTACACTCCCCTATGGGGGGTTGAACCCCCTACCTCACTTAGACTCATTTAGAGTCCCACCCTCTCGGGTTGATTTTGAGCTTGCAGCTACAACTTTCTTTTGTTTAAAGGATTTTCTGTTTTTTACTTTTTTGTCCTATTATACATAAATAATATCATTAAAAAAAAAAAAAGATAATTAAAAAAAAACTTCAAATTTTGAAAATTGAAAATTCTATTTTTTTGTAGTTTTTTATTTACTTTTTTTTACTGCTAGTATTTTAAAAGCACGAAATAATCTTGAAGAAGCCTTTCTTCAACTT…
44	rrn16S		104962	106459	1498	0.5093	H					135	ATTTTCATCTTTTTCAGCTTTTTGCCTTTTTTCCAAAAGGTCAAAACAAAAGAAAAGACGAAGCAAAAAATGGATTGCTTAAATCCTTTCAATATTGAATGCTCTCTCTCTCTTTGAAAGAGAGCATTCAATACC
45	tRNA-Ile	I	106595	106669	75	0.5067	H				GAT	40	GCTTGTTTTCAACGAGTTTCAATCAAAAAAACCATAAATT
46	tRNA-Ala	A	106710	106782	73	0.5068	H				TGC	224	CCCTTCCATTCATTTTTTTGTTTTCATTTTTTCATTGTTTTGACCTTTTGGTTATTTCTATCTTTGCAAAAAGGTGCCCTTGGCCCTTTGCCCAGAAAGAAAGAGTGAACAGAACAAGAGAGTGGGAGTGATTGATCTTTTTTCTCTTTTTCGAGAGGGAAAACAAAGGTTTGCTTCGACTTTGTTTGTTGCAGCTTTTTGGTGAAGATATTTCGTTTTTTTAG
47	rrn23S		107007	109058	3017	0.4879	H					63	CTATGTTTACTTTTTTTACCTTTTGGTAAAAAAATGAAAAACCTCCGGAGCTTTGCTCCGCTG
			109999	110963
48	rrn5S		111027	111151	125	0.472	L					810	ATCATTCTTTCCTCTTCAGTTGTCTCGATGACTTGTTTCTTCAGTTGTCTCGGTGACTTCTTGTTGATTCCAGCGCTTCTTTTTTTTGATCCTTTTGTTCTTTTTTTTTGTGTTTCTTCTTTTTTTGCAGCGCAAACTCTGTTTGCAGCAGCTTTCTGCAAATGCAGAAAGTTGTTTTCAACCTTAGTGGAAGTAGTAATTACACTTGGGTTGAAGACAACAAAAAAGAAACAAGTGTTGGGTTGAAGACAACAAAAAAGAAACAAGTGTTTGTTGTACACGAAGGATGAAAACACAAAAAAAAGATTTAAGGTTTGCTGTTTTTACCTTTTGGTAAAAACAAACAACAAACAAAGTTTGTTGGAGCTTTTTGTTTTTTTGCTCTTTTTTTTTTGCATT…
49	tRNA-Ser	S	111962	112051	90	0.5333	H				GCT	660	AAGAACAAACTCTGAAAAAAAACTTTTTGACCCCAGAGGGGCGAAAACAAAAAGCTGCCTTTTGGCCTTTTGGCAGCGCTTCTTTTTTTTTTGTGCAGAACCTTCCTGAAACGGAAGCATACACGCATGGAAAGATACACTTGGTTTTTTTTGTTGGATTCAGTGTCTGTGATTCAGACACTTGGGTGATTCTTTTTTGTGTGTTTTCATCTTTCATGTCTATATGTACTCCATACACGAAGGATGAAAAACGCAAAAAAAGAGACAACAAAAAAAGATGAAAGCTGCCTTTTGTTCTTTTTTTTTGTGTTGAACATACAGATTTTTTCTTTTACATTCGTTTTTTTGCATCCAAACCTGGTGTATGTTTCCATATGACGAAATTTGAAAAGACAAAAA…
50	rpl12		112712	113110	399	0.3308	L	132	ATG	TAA		695	AAAATAGATTTTTTTTTAATTTTTATCCTTTTTTGATTTTCAATATTCTCAATTTCTATGACAGTTTGAAGAAAATAAAATTATTTCATTTTTTTCTTTTCGTCAATTTTTTAAAATACTCTCGATTTTATAGTATTTTTCTCTTTCTATAACAGCTGAAAATAGAAATTTTTAGTGTTGTGTTTAAATAAAAAGCAACAAAATTTTTTTGTTTCTTTTCCAACTTTTGGTCAAATGAAAAACATACAAATCATTTAGAAGTATATTCTATGTTTTCGCTAAGCACACTTTGCATTTTGTTGTTTTTAAAACTTTCTATCAAACAAAGTAAAAAAAAAGAAAAATAATAATAATCCTTTAAAGCAAAACAACTAGTATTCAAAAAATTTTAAAAATTGA…
51	cemA		113806	114963	1248	0.2532	L	415	ATG	TAA		347	TTTGTAGTTGTTTGGTATAAAAAAAAGGGTTTAAAAAATTTTTTTTGTGATTTTAAAAATTCAAAAAAGATAAATTTCTTTTTCTATTCATTTTCATAAAATTCTTCATTTTTAAATTTTAGATCTATATTCAAGGAAGAAAGTACATTTAAGAAATATTTGTTTCTTGAAAAATACTTTGGCTTTATTTGGGGGTGTGAAACAACAAAAAATTCAAAAATAAATCAACAAAATTTTTACTTTTGAAAGTTTTCAATATTGAATGAAGTTTTCGTTTTTTTTGTTTTCTGTGAAATCATTGTATGTATTGTAAAAATACAATGATTTCACAGAAAATTTATAAAATA
			115226	115315
52	psbI		115663	115779	117	0.2564	L	38	ATG	TAA		230	GTGATAATATTAAAATTTGACAGTTTTTCACGATTTATATATACAAAGTTCAATATGGTTTTTTCTTTTTTAGTACTTTGTCATTTTGTTTTTGGATTATAAAAAACACTCCATTGTACCTTTGTTTTCATTTTTTCTTGAGCTCACCCTTTGTGTAGGACGTCCTACACAAAGGGTGAGCTCAAGAAAAAATGAAAGAAAAAAAAAAAGAACAAACAAATTAAAGAAAA
53	atpA		116010	117533	1524	0.3537	L	507	ATG	TAA		690	AAAAAATCAAAAAAAAATAAAAAAGTATTTCTTTTTTTAAAAAAGATCAATAGAAAAACATTTTTCTAGAATATCAAAAACTTCTCTCTTTTGAAATTTTAAAAGGTTTCTAAAGAATACTTTTATAAAATAGTTAGAATAAAAAATTATAAAGTTTAAAAAATTTTATATTTTTCTTTCTTTTCAAATGTTGCTTTTCATGGACTACGTAAAAAGCACTCTAAGAATACTTTTCATTGAGTCTATTCAGAAAAATACATGATCTGGAGAACAGTTTTTATCCAAAAAGGGAGAGATCATGTTTTTCTTCTTTTTTTTTGCATTCAACCCAAGTGTCTGTTGTATAGATCACGACGAAGGTTGAATGCAAAAAAAGAGCAAAAGCTAATTTTCTTTTAT…
54	tRNA-Gly	G	118224	118296	73	0.5479	L				TCC	573	ATTTGTTATGTAAATAACATAACAAATTTGCAAAAAAAAAACAAGATTTTCTATCTTAGAAGTTTGTTTTTCTGTTTTTCACTTTTTTATTCTTGTTTTTTCTTCGAAACTTATAGATTGCATTTCTTTTTTTGAAACCAATTTTTCATTTTTTGATTCTTTTGAAGACATGAAAAAAATAAAAAAATGAAATTATGCAAAAAATTGTGCTTCTTTCATTTAAAAAAAATAACAATTCAAGTTTTTTTTATTGTATCGGCTAGATCAAAAATATTGTTTTTATCAATATTTTTGATCTAGCCGATACAATAAAAAAAATAGAAAAGCTTTTCTGTTTTCTTCTTTTTTTTGTTAAATTCAACAAAAAAGAAGAAAGTAGATCGTCTATTCAATACCACA…
55	rps14		118870	119172	303	0.3201	L	100	ATG	TAA		610	AAATAAAAACTAATAAATAATTTTTATGCTTCAAAAAAGAAATTTTTTCTTTTTTATCATTTACGAATTGGAGAAAAGAGAGTTAAAAAACAAAACTCTCTTTGTTTTGTATGATTTTTAATGAAAAAAAAATCATACAAAAACTTTTTCTTTTCTTTCCTTTTTTTTTCAAAAAGCTGCCTTTTTGCAACGCTTCTTTTTTTTGTGTTTCTTCTTTTTTTGTTTGATTCAACCTTAGCTTAAGTAATACTTAAGCTAAGGTTGAATCAAACAAAAAAAGAAGAAACACAAAAGCTGAAAACATGAAAAAAAAAAGAACAAAAACAAAATCCTTTTTCGAGGGCTCAAGTGGTCGACAATTCAAAAAAACAGTTTGTAAAAAAATAGAGAATTTTTTAT…
56	rps19		119783	120064	282	0.3156	L	93	ATG	TAG		1079	AAAAAAATTTTTTTTATTGAAACTTAGCTTTTTGTTTTCTCTTTTTAAATTCATCAGTCTTTTTTGACTTTGAAAAAACTTCCTACTAAGGAATTATTATTCAAATAATTCCTTCGTTTTTTCTTTAAGGTATTTAAAAACAAAAAGAAAAAATTTTTCATTTTTTCTTTTTTTAGAAAACTTCACTACAAAAATGTTAAAAAACAATATGTTCATTTTTTCTTTTCCTTAAGAAATTTTAAGGTATTGTTTTTTTTAGTCTTTTTTTGAAAAAAAATAAAGTATTCAAAAAGTTGAAGTACTTTTTTATTTGTTCAAAGAAGAAAGAACAAAAAATAAAAAAAAACAAAAAAAAAGAAAAAAAACTTTTTGGTTTTTTGTTAAGAACAAAAAAGCTAC…
57	rpl2		121144	121971	828	0.3853	L	275	ATG	TAG		589	AAATAAGAAAATAAAAAACAAACTCTTAAAAATGTGATAAATTCATTTTTTTTAGAAATTTTTTAATGCTTTTTCTTGGCAAACAAAAAAAAAGTTTGTTGTGGCTTTTTGTTTTTAACAAAAAAAACAAAACAAGAAGCAAGAAAAGAAATAGCAAGACCTAAAAGAGATTCGTCTTACTTTTTTTTTTAGATCTGTTTTTTTGGTATTTTTGCATCTCTTTTTTTGTATATTGAACATATTACAAAGAGAACATTCGTGTTTCTTTAAGAAAAGAAGCGCAATATGCAAAAAACAAGAGAACGCAACAAAAAAAGAAGAAAACAAAAAGATACCTATTTGATCAAAAAAAAGAACACTTCTGTGTTTGTCATGAAAAAAGAATTATTCGAATCTTTC…
58	rpl23		122561	122830	270	0.2704	L	89	ATG	TAA		1138	AATATTTACTGGAGAAAAATGTGCTTTTAATAATTCTCTCCAACGATTAAATTCTTGAGTTGATTTTTCAGAAAGACTCATATGTGTATAGTTTTTTCATTCTTTTATCTATCAAAATCTTACTTTCATTTTTTTAGAAGTAAAAAAAAATTTTTGAAAATAAGAAATAATAATTGGCAAAATGCTAGTTTTTTACTCTTTTGTGTTCAACGTTTTACAAAACGTTGCAACAAGCATAACAAAATAAATTTGTTCTACATAAACAACAAATAGTACTTTTTTTTGAAAGTATTTTAGGAGAATATCTATTCTTTATTATTTACTTTTTATTATTGTTTTTAAACTTAAAAACTTTTTATAACATTATATCATAATTATTAAAAAGATGAAACATTCAAT…
59	tRNA-Phe	F	123969	124040	72	0.5278	L				GAA	446	TTTTCAAAACTGAAATTGAACTTTTTTTAGAATAAAGAGTACTAACACCTATTATCTTAGCATTTTAGAAAATTGGATTCAATTTTAAAAAAAACTTCAAATTTTTGAATACAAAAGTTTCAAACTCAATCAAGAAAAAGAAGAAGTATACGACAAAACAAACAACATGAGGAAACTGAGTGTTCAAAAAAAATGATTCTTTCTATTACAGTTTTTTGTTTCAGCAATTTCTCAAGAAAAACAAGATTTTCTTATTGACAAAAAATATAAAATAATATAAAATACTAGAAGAGTGAATCGTTCATTCAAAAATTTTTTATTTTTTTTCTTTTCATTCTTTGTAAGAAAATCAATAAAAAAGGAGTCTTTGAAAAAAAGACACTGTGCTTTTTTTTTTAA…
60	tRNA-Glu	E	124487	124559	73	0.589	H				TTC	54	TTCAAATAAAAGAATTTATAAAGATCAAATTATCAAAGTTGTTTTTTTCTATTT
61	rps4		124614	125369	756	0.2976	H	251	ATG	TAA		208	AAGAAGAAACCCGAATAAAGAAAAATTTCTTTTTCGAATGTTTTTTTGTTTAATTATTTTGTCTATTTAAAAGAATAGACAAAATAATTAAACAATGATAAACTATATTTATCATTTTCAGAATTGTGTTAAAAATTCGAATTTTATATTTTTCTCTTGTTGTTTTTCATTAGTGCTGTTTTTTTTTGTAGTTTTTTCTTTCACTAAA
62	tRNA-Leu	L	125578	125659	82	0.5366	H				TAG	467	TAAATATAGTTCTCCGTTTTCAAGAACGTTCAAAATTTTTAATTAAATTGGTTATTTTTTTTTAAAGTCGACAAATGAATGAATTTTTTTTTATCTTCAAATGACTGATAGTTTTTTATTGTTTTCATTCAAATGAAAACTTCTAGTTTCTACTATTTTTTTTATCCTTTTGCATTTAAAAAAAATTTGCAGATGGTTGCTCCCTTTTATTTCAAATGAGAAACACCCAAGCAAATACATTGTTTTTGCATATGCAAAAACAATATGAATGGCGAACGAGCACATTTGAAAAAAAGTCAAAATGGGTTTATAAAGAAAGTAAAACTCAAATAAAAACAAAAGATCATTTGTCTGGTTCTTTTGTCAATTTTTTTTAAATTGACAAAGGTAAAACACTTT…
63	clpP		126127	127755	1629	0.3026	H	542	ATG	TAA		1063	TTGTTTCTTTTTTGTGTTGATATCTTTGTTCAAAATTCATTTTAAGCAAAGAGGAGATATTTTGTTTTCTTTAGAATATTCATGAATATTCTAAAGAAAACAAATCTTCAAAAAACTTTCAAAAAGGAGTCAAAAAGAAGAAAAAAAAAGATTTTTCAAAGTATAAAAATACAAAGAAAACGAATTAAAAAAAGCTTTTTCCAAAAATGATTTAAACCGTATTCTTTAGAACATAAGCAAAGCTTTAAGAGGTGGTTTTATGCAAACAAAAAACAAAGTTTGTTGTTTGTTTTTACCAAAAGGTAAAAACTGCAAACCTTGACTCTTTTTTTTTGTGTTTTCAGGCTTAGCGTCTGTAGAATATAGACACTTGATTTTTTTTTTGTCCTCAATCTTAGT…
64	rpoC1		128819	133525	4707	0.2938	L	1568	ATG	TAA		1354	CAAAGGTAGGCTTGTCTTTGTCTGCTCTATTGATTGAGCGCAAATTCGAAATTTGAAATGGTTATGGCTTTGAACATTTTGTTCTCTTATAGAAAAATTTCCAAAAAAGGCTTTCTTTTTTAAAAAGAAAAGAGTATATCCTACTTTGTTTTTCAAGTTTATTTTTTTTTTTTTCCAAATTGGAATTTGATAGTTTTCGTCTTTATCTTCATGTATTATCTTTTTTTTTCAAATACTCTTGAGCCAAGAAAAAAAGTTTTGGCTCAAAAGTATTTGAAAAATAAAGCCTGAAAAAGAAGAGCAAAAATTTATCTTTTTTTTAACTATTTTTTCATTTTTTCTGGTTTTTTACATTTCTGTGAATAGACTCTTTATTTTTGAAATACTCTTGTTTGTTGC…
65	tRNA-Gln	Q	134880	134951	72	0.5417	L				TTG	384	TTTATCACCCAAGAATTTTCTCTATAAAAAAAAACGTTATGCTGCTACTTAGAAAGTTCTGACATGATCTATTTTTTTTTGAAAAAGAAAATTCTGGGCTTAACTACTAAGTTAACATTTTCAAACAAAAAAATCAACTTTTCTTTGAAAATTCATTTTTTTGATCAATTAGATGTTGCGTTCAGCTTTTTTCACTTTTCGTAATAGAAAAGGTCATTTTTACTTTTTTTGATTTTTGTTCTTGAAAAAAAACCATGAAATGTATAAAAATATACAAAAGTCAGCATGACAGCGGTTTTTGAATGAAACAAAAATTTTCAACAAAAGTGTTTTTATTCAAAATTTTTGTTTTTTTGAAAAATTTATAAAAAAAGAATTTTGAAT
66	tRNA-Met	M	135336	135408	73	0.4658	L				CAT	342	TTAAAAAAAACAGAATAAAAAGAAGAAATAAAAAATTCTCCTTTTTCGTGTTGATAAATTTTTAAGAAAAAGTGACCACAAACTTTGTTTGTTGTTTGTTTTTGCCTTTTGGTTTTTACCAAAAGGCAAAAAAAAATAAACATGTTTCTATTCTTTTTGTTTTATTCTTTGTAAAAAAAACAAAAACAAAAAAATTCTACAAGAGAATTTCTAAAAGAATAGAAACACGTTTAAAAGAAGAAAATAAAAATACATTTTTTGCTTTTCTCTAAAAGATTCAAAAACAATAAAGTGTCAAGGAGGTATACAAATAAAATACTTTAAAGAAAAAAGGAATTCTTC
67	petB		135751	136398	648	0.3519	L	215	ATG	TAA		812	AGAATAGAAAGAAAAATTTTTTTATAATACCATTAAACGAAGAAGTGACAGAAAGAAAAAACTTTTGATTTTTTCATTCTGTTTTTCAAAAACAAAAATGGCTCTCTGGCCACAATTCTATCTTTTTTTCAAATACTTTAGTTCAAAAAATAAATCTTTACTCAATTGTATTTAAGAAATAATTTAAGAAAAAGTACAATTCTCTTAAGTTCTCAAGAACTTTGTTTTTCGAGAGAGTTCTTTTTTTGTGACTCTTTTTTTTGTGTTTTCAAACTGAATGTTTTTAGTACACACATTCAGTTTGAAACACAAAAAAAAGAGGGAGCATCTTTTTATTTTTGTCCCTGTCAAAATTCAGGGTTAAAAAGTTTTCAGCTTTTTGAATACAAATTCTTTTTT…
68	rps18		137211	137527	567	0.2981	L	188	ATG	TAA		794	ATGAAAAAGAAAAAAGAGTCCTAAAGTCTATCTTTTTTTGAATCGAAAAATTTTTTACAAATTTTGACGGAGAAGTTTTTATACTTTTTCCTTTTTTTCTGTTCTACGTTTTTTTCAAAAAGTCTATTTTGTTCAATTTTGGCTGTCTATTTTTCAACAACAATGAAAAATAAGAAATCTATACAACGTATTATAGTTCTTAGAGGCTGTAACAAAACGAAGCTGTCTTTTTTTAAAGGCTTTAAGAGACCGTAGTGACATTGTCACTACGGTCTCTTAAAGCCTTTAAAAAAAAAATAAAAAAAAAGTAGACCAAAAAAAATAGAAATTTTGTTTAAAGTATAAAATAAAAGGAATGTTCAAACAAAATTCAATGAATACTATTTTTAAAAATCCCCA…
			137555	137804
69	atpB		138599	140041	1443	0.3604	L	480	ATG	TAA		573	TTTTTGAAAAAGAACTAAATCTATGAATTTTAACTTACTTTTTCTTTTTGAATTGTTGTTTTTTAAAAAAGGTTCTGTAAACCGCATTTTATTTTCTTTTTTTGTTTTCCATGAAAAAAACTAAAAAAAAGCAAACTTTGACTCTTTTTTTAGTGTCTGTACTACAGACACTAAAAAAAAAAGCAGCTTTTTAAAAAATTCAAAAAAAAGAACTTTCTGCATTTGCAGAAAGCTGCTGCAAACAAAGTTTGCGCTCCAAAAAAAATAAAAACTTAGCAAAAAGATAAAATTCTTCTTTTATGAAATACATTCATAAAGAATAGAAATATTTTTCATGAAAATTGACATTGACAAAATTCAGAAAATTTTTCAAACACTTACTTAAAAACTTTTTTTTCT…
70	tRNA-Pro	P	140615	140688	74	0.5676	L				TGG	430	TTATTCTTTCATTTTAAAGAAAAAAGTTCACAATTTCAATTTTTTAATACTTTTGCTCAAATTTTATTAAATTTATAAAGTATCTTTCTTTTCAGAAAGACCTACTGGAACAAGAAAAAGGAGAAGCACCAGTAAAATCTAAAAAAAAATTTGAACATCTTTGTTTTTCATTTAAAAACATGAAAAACAAAGAACTTATATATGGAATTATACGATTATTATATTTATTTTCAAAAAAAAAAGCAATATAGAGACTGCTTTTTTTATAAAAAAGTATTGGAGAACAAAAATAAAAAAAGAAAATACAAAAAAGACCAAAATTTTTTTCAGTATTTTTTATCTTTTCTTTTTTTAGGAAAAAAAGAAAAGATAAAAAATACTGAAAAAAATAGAAAAAGA…
71	tufA		141119	142375	1257	0.3683	L	418	ATG	TAA		525	AAAATAGATTTTTGAATAAGTTTGAGTTTTTTCTGTATAAGCCAATTTTCCGAGTAATAATAGTTTACTGAAAATTTTGCAATAAAAAAACTTTTATTGCATAAAAAACCAGAAATGTTTGAAAAAAAATTTATCTTCTTTTTTCATTGTTTGTTCTTGTTTTTGTCCTCTCAATACAAAAGGCAAACGAAATCAAAAATAACCGCTAAAGAATCTTTTGGTTTTTAAGCAAAAAAAACCATTATAGGGAAACTACAAGGAGAATGATTAAAAGAAAAAGCAAATCCAAAAACAAAGAGAAAGGTTTTTTGATTTTTTCCTTTCTATTACACCTTATTCTAAGGTGCAAAAACAAAATTTTGGAACAGTAAAAAAAAGCAAGAAAAAGAGATAAAAGAT…
72	tRNA-Val	V	142901	142973	73	0.4932	L				TAC	224	AAATTTTCTTATTCTTTATTATAAATTAATATATAAAAAATTGCAACTCATTTTGAAATTTTCTATTTTTTCTCGTTTTTGCTGGATTCAAAAAAACAGAGGCGCAACAATTAAAAAACAATCCCAGATACTTAAAAAAAGTATACTTCTTTTTAATTTGAAAAAAAAACTCTAAATTTCGAACAATGAAAAATAAAATTTTCCCCCTCTTTTATTTTTTGAAT
73	tRNA-Arg	R	143198	143271	74	0.5676	L				ACG	811	TTTTTGAAAAAAAAGGAAGTGTTATAAACCATAGACTATGGTTTATTTAAAAAATAATTTTTCTATTTTTTTTATTCATTCATACTTATTTTATATTGGTTTTCAAAGAAAATCAAGTTTCAAAGAAAGAATTTTTTCTTGTTTTTCTTTTTTTTTAAACATTCTAAAATTCTTTTTTAAATATCTACAAATATTGCTTAAAACAATAATTTCTTATGTTTTGAATTTTTTAAAGTTTCTTTCAAATATACTAAAATAAAATCATTGACAAACTAAATATATTCCTCTTTTTTCAAAAAAGTACTTTTTGTCAATGAAACTTCAAAAGTATTGACTCTTTGACTATGTTTGTTCTTCTTTTCTAGAGCCTTGGTATAAATTTATTTTTTACAATACTTT…
74	psbM		144083	144190	108	0.2685	L	35	ATG	TAA		1087	AAAATTTTTTTTGAGAAATTTTTTTAAATATTGTTTTTTAGAAACTTTTCTCTTTTTTGAATTTCAAAAAAGTTTTATCAAAAAAGTTTTATTTATTCTCTTCATTTTTTTAGTCAAAGAACCAAAAAAAAGGAAATTGAAAGAAGCCTTAAAAAACAAAATTTTTCTTTATGTTTTGTTTTTTTGGTAGAAAACCAAATTTACAAACAAAAAGAAAGAAAAAATCAAAATTTATCTTTTAAAAGAAGTTTTAAAGATATTTAAAATTTTAGGCGGTTGACCACCACTTTTTGTTTTTCGAAAAATAAAAACAAAAAAGAAAAAGAACAAACTTTTTTTCATTCTTTGTTTTGTGAGTGCATCAAGCTTTCCTTTTTCTATAAAATCTTTTTTCTGTTA…
75	psbZ		145278	145466	189	0.3228	L	62	ATG	TAA		1835	AAAATTTAAAATATTCTTGCTATGCAAGAGTCAAATTTCAAGAAGAGGCTTGAGAATTGTAGAATTTTGATATTTTTTAAACATTTTCTTTTTCTATTCTTTGTTTAACAAACATTTAAAGAATGAACAGAAGAAAATGAAAAAATAAAAAATGATAGAAAACAAAAAAACCTTTTTTCTTTGCATGTTTTTATTGACCTTTTTCGAATATAAAAATATTCTGCATGTTTTTTCACTCTTTGAGAATCTTGTGTATTTGAAAGTGCTAAAAGAATGTTTTTTATTTTGTTCATTTTTCTCTCCAATAGATAAATAATGAACAAAATAAAAATAAATAAAAAAAAAGCAAAAACAAAACGAAAATTTATATTTCAAAAAAAATCAAAAGAAAAGATTTTT…
76	ccsA		147302	148402	1101	0.3106	L	366	ATG	TAA		919	AGATTCAAAAGAAAATAATAAATTGAAAGTTTTTTAGTCTTTTTTGATCCTGGATGCTTGTTTTATTTAAAGCAAAAAAGCAAAGCTCAAAGGACCAAAAAAACTCTGAGTTTCTTTTTTAAAAGTTCGTCAAAAATCAAATGGAACACAAAAAAACTCCTCAAAAAAGGAGTACACTTGTTTTTTTCATTTTCATTATGAAAAACAAAGAAATTTCTCTCTTTTTTTTTTGATTCTACCGAGTCTAATAACTCTTTAGACTTGGTAGAATCAAAAAAAAAAGAAAGAAATTCTTCAAAAAAGTAAATACTTTTATTATCCTTTCAGTTTTTCTTTTTTTAAGATTTATAAATTTCCCCAAGTATTTTCCTTTAAATCGTAGAATTTGAAAAAAAAACA…
77	psaB		149322	151529	2208	0.3705	L	735	ATG	TAA		2099	AGTTTTATTTTATCCTAATTTGCTCAACTATTTGCAAAGCGAACTTTGCTTTTAAAACTTCAGTGATACCATAAAATTTTTTCTCCCCATCCTCTTTGTTTTTTGTTTAATCAAGCTTTAAACGTGATAGAACAAAGAATAGAAACTTTCAAAAAGAATAGTGGTAAAGAAAAAGTCATTCAAAATCGTTTTCATAAATGCAAAACTCAAGTACTACGCACTTGTTCATAGATTTCTTCTTTTTTTGATTGTCTCTTTTTTTTTTGCATTTTCAAACCTAGAGTACAGACACTAAGTTTGAAAACACAAAAAAAGAAGCAGTAGGTTTTTGTTCCTTTTTTTGTTGGGTCAACTCAAAAAAGAACTTTCTGCATTTGCAGAAAGCTGCTGCAAACTTTG…
78	tRNA-Glu	E	153629	153701	73	0.589	L				TTC	514	ATTTTTTGTAATGCCAAAACTTTTTTTGTAGAATAATAAGAATTGGAAATTCTTTTTTTAAATATTTTATTTTCTATACTTTATATACCAATTCTAAAACAAATTGTCAACAAATTTGAAGTTTTTTTTTATTATTTTTCATTAGCTATATAAAAGACTCATATACGAATGCTTCATTCTTTAAAAAAAATTTATATGTTGTTTTACGGTCGATGTTCTTCTTTTTGTATTTCGTTTTTTTCCTCTTTTTTTTTGTTTTCAAACTTTGTTTCTTTACGAAATAAAACAAAGTTTGAAAACAAAAAAAAGAATCACCACTTTTTGGTATTTTTTTGTAAGGAACTTTTTTTTAGAACCAACTATAAAGACCATCGCAAAAAAAAAAAAAGAATAATAAGA…
79	tRNA-Trp	W	154216	154288	73	0.5068	L				CCA	455	TTTTTTCAAAATTATTTTTTTAGTTTTGAAAGAAAAAAAGAAATTTTTTTCTTTTTTGAATGCTTGAAAACTAAATAAAAAAAGAAAATAAAAATTTTTGTTTTTTCTTCTTTTTAAAAAGAAGAAAAACATTGTTTCTATTTATTATCTCATTTTTCTCAAAAAATGTCAACTTTCAAAAAACTTTAAAGGAATAAACTTTTGTTTTTATTTACAAAAAGAACATCAAATTTTTGCTTCTGCACCTTTTTCAAATATTCATTTTTTTCAATTGAAAGCAAAAAAAAAAAATTGACTAGGTCATATTTTTGTTTTACATTGAAATAATGTTTTTGTTTTCGTCAAAGATCAAAAAAATAAAATTATTGCAATAGATATTCACACAAAAGCATAGAGTAT…
80	tRNA-Gly	G	154744	154816	73	0.5753	L				GCC	329	AAAAATACATATATTTATTTTCATTTTATAAAAATAAATTTTTAAAGTCAATCTCTCGAGTCCCCTGATCTTTCTTTGTTTTTATTTGAAGGATTTTTTAAATCAGAAAATTTCTTTTTATTTTTTTTTCCTCTTTTTTTGTTTGATTTGACCTTAGTATGAGTAATACTTACACTAAGATCAAATCAAATTAAAAAAAACACAAAAACTGGCACAAAAAAAAAAGCAAAAAAAAAAATGAAGACAAAGAGAAAAGCTATTCAAAAAAAATAAATAGAAAAGAGATTTAGACTTGGTTCTAAAATATATTTTTTTTAATTTCTATATCT
81	rpoA		155146	156480	1335	0.2674	L	444	ATG	TGA		237	CATTTGTTTTTGTTTGAAAATATTTTTATTCTTTAACGAGAAAGACAAAACACGAATTTCGTAAAAATTACTAAAAATAGAAGGATTTTTGAACCTTTTTTTGCAGCGCAAACTTTGTTTGCATCAGCTTTCTGCAAATGCAGAAAGTTTTTTTTTCAATAAACGTTATTGAAAATAATAACGTTTTTGTTACTTGACTGATATTTTGCTTTAAAGTCCGAGAGATATCCTTTCTTA
82	tRNA-Met	M	156718	156791	74	0.527	L				CAT	121	TTTCTATAGTATACAAAAATTATTTAATAAAAAACAACTTTTCCTTTTTTCTGTTTTTACTAAACAGCCCAAAAAAACAATTTTCTTTCCGAACATTTTGGGCTATCAAAGAAAAAAGTGT
83	tRNA-Arg	R	156913	156983	71	0.5211	L				TCT	448	TAAAAACAATACAAAAAAATTTTTAAAAAATCTTTACTTTGTAACTTTGTAATAAAAAGGATTCAAAAATAAGAACTTTTCTTATCTTCTACTTTCTAATTTACCTAAAATTATGAAAAATTTCTATTTTTTTTGTCTATTTCCATTTTTTTTGTAATTCAAAAAAAGCTACACCAAACAAAGTTTGGTGACCAAACAAAGTTTGGTGACCAAACTTTGTTTGGTGTTTGCAACAATTTTTATACTTTTCTTTTGATGTTTTAAAAAACAAAAACTAAAAAAAAAGATTTGTATATATATACGTATACGGAAATATACATTATTCTCTTTAAATAATTTAAATTGTTCAAAAGACAGGTCTATATAAAATCCTTTTTTTTTTATTTTTAAACTTCATTG…
84	petD		157432	157914	483	0.3623	L	160	ATG	TAA		1343	ACGAATAAATTTTTTTTCATTTCTCGTCTTTTCTTCAAAAAAAAGTTTTAAATAAATGAATTCAATTATTTTTTATTTGTTCCTCTCATCTACTGCTTCTTTTTTTATATTCCCAGCCTAAGCCTATGCAATAAAACGAAGCTTCTCATTTCAAAAAACAAAAAAAAAGAAAATAAATGTATATGTTCTAAATAATAAAAAATTTTAAAAAATTTTCGCTTTTTTTCTTTTGGTATTGCTCTTTTTTTATTTTTTATTATTTTATTGTTGTTGCTTGATTTTTTTTCTTTATAATGGATACAATGTTCTATCAACAAAAGTTGTTTTTAACAAAAGAAGAAAGAAAGAAATACAAGGATAAAAAAAAGAGAATACACAAAGTATACTTGAAAAAAATAA…
85	petA		159258	160220	963	0.3344	L	320	ATG	TAA		1025	AAATTTTCATAAAAAAAAGTTAGAAACTTTTGTATTTCTCCATTTCTACTTCTCTTCCTTTTGATTCTCAGCTTCTCTAAACTTTGTTTCTTTTTGGCCCCGGCTTTTGCTTTTTTTTTGTTTGACTCAACTTTCCTCGAAGTATTCCTTCTACGAAGGTTGAATCAAACAAAAAACAGGTCACAAAAACAATAAGTATATTTCTTTGAATGGAGAATTGCAAAAAAACTGATTGAAAGCTTTGCTTCTGACAAAAATGAAAAACTGCAAAAAATATCAAGGAAGAGAAGTTGCAGCCAAAGGACTAAATAAATCAAACAGAAATGAATTTTTGTACATCTACCTTAAAAAATTTGTTTAAATATTCTTGGTTGATCTGATATTTTTCTTTTTTTTTGA…
86	rpl36		161246	161359	114	0.2982	L	37	ATG	TAA		282	AAAAATTTTAAAAAAATTTTGAATTTGTGCACTTCTTTTGCACGATTTTTGAATACATTTTTTCGTTTTTCTTTTGATTTTTTTACCCTTTTATGAAATAAAAAAACGTAGAAACAAAAAAAGAAAAAAACATATGACGCTTCAAAAAAGAGTGGTTTTGTCGTTTTGTTCTTTTTTTTTTGTGTTTTGTCTTTCTTTCGCTTTTCTTTGAAACATATATGTTTCAAAGAAAAGCGAAAGAAAGACAAAAAAATTCCTCAGTTGAGAAAAAATCAAATTTTA
87	chlL		161642	162511	870	0.323	L	289	ATG	TAA		454	AAAAAAAATTTTTTCTTTTCAAACAAATCGCTACAACCGTAAAATATATCCATTTTTCCTTATCTTTAAAAAGAAGGTTGATTTCAAATTTTTTTTCATTTCTTTTTTTTGCATCTAAAAATTTTATATTCTAGGAAAACTTTTTTTAAAAATAAAAAATCTTTCAAAAAAAAAAGAGAGTATTTTTGAACCTTTGCCTCTTTATTTTGTTTTTTTTATTTAATCTAGGTGTCTGTTGTACAGATCGTGAAGGCTGAATAAAAAAACCTTTCTGCGTTTCCAGAAAGCTGCTGCAAACAGAGTTCTTGCCTCTTTTTTTTGTGTTTTCATACTTAGTGCCTGTAATACAGGCACTAAGTATGAAAACACAAAAAAAAGAACTTTCTGCATTTGCAGAAA…
88	ycf3		162966	163478	513	0.3411	L	170	ATG	TAA		607	ATTTGATTTTTTATCAAAAATTCTTACTAAAGAGAAAACCTTTTTTTTCTAGTTTCCCTGTTTTTCATTTTAGCCCTTTCGAATTTTGGCATGAGAACTTTCTTTTTCTTTTTTTTTGTTTACAAAAGCTTTTTGAAAACAAAAAACAAAATTTGTTGTAGTTTTTTGAGAAAACCCAAAAGACATACAAAAAAAGCACAATAAAAAAAACAATCAAGAAAAATAAACAAAAAGTTTTATATAAAATTGCCAAAAGCCTTTACCAAAAGTATACAAAAGTCTAAACTTCAAAAAAGAAGGAGAAGAAAAAAAAAGTCCTATTTATCTCCTATGAACATAATGGATTTATACCTTTTTTAAAGAAAAAACAAAATTCTGAAAAAGATTTTTTGAATTCTT…
89	ycf4		164086	164703	618	0.2896	L	205	ATG	TAA		701	AAATTTAAAAAGAAAAACTTTTTTTGAAAACTCAAAACTGAGTTTTTTCTATCCAGTTTATCAATAAAACAAATTTTTAAAAGCTAAAAACTTTCTCTTTTCATTTTCAAATCATCTTTGTTTTCCTTGTTACTTTTTTTTTATTCAAAACTCCTTAAGGTTACTCTTTTTTTTCTTTGTTTGAGAAATGTTTTCTTTTTTGTCCTCTTTTCGAAATTGTTGAGAAAGAAACACAAAGTCGAAAAAAGAATGAAAAAGAAAACAAAAAGAACAATATCTTTCAATGAAAAAAAACAAGAAAAAATTATTTGAAACTTCAATTTTGAACGAATTTTGAACATAGTTATATTCCTTGTTCTTTCTTTTTGTACATTGTTTCAACTTTTTGTTTTCTTTTTT…
90	rps9		165405	165851	447	0.3154	L	148	ATG	TAA		756	AAATAAAAATGAGAAAAGGATCATATTCTCTTTATTTTGTTTTTCTAGAATTGTTTGAAATTTTTCTATTTCCTGCTTCTTGTTTGTTTTACTTTTTTTTCTTTTTAGATACGTTCTAATCTTACTATACGTCTAATAAAGAATAATTGAAAACACTGGTCATTTTTTGAGTTTTGTTTTTTTGATTGCATTTTTTACTTTTTTGCAGCGCAAACTTTGTTTGCAGCAGCTTTCTGCAAACGCAGAAAGTTCTTTTTTTTGTGTTTTCATACCTAGTGCCTGTATTACAGGCACTAGGTATGAAAACACAAAAAAAAGAAGCACAAAAAGATACACTCAGAAAAACAAAAAAACTCTATAATTTCAAAAAAATTGTTGAATTCTATAAAAATCGAATAG…
91	psbE		166608	166853	246	0.3374	L	81	ATG	TAA		4326	AAATAATAAAAAAGCTACTTTAGTAGCAAAAATTTTAACAATTTGTATGCTTACCATTATTTTAATATAAATATTTTAAAATTTCAAAATTTTGAAAAATAGAAAAAGGATTTTCTCGTTTTGCCTTTATTTTGCATTCTCTTTTTTTTTGAAAAAAAAAAGAGAATGCAAAATAAAGACACTGCAAGAGCAAAAAAAAAGCGATAGAAAAAACCAAAACTTATGAAAAAAAAAGTGAAGCGTTGGGTTCTTTTTTTTTTAAGATACAAGAACAGATGAAATACTTTTGACCTTGTATCTTTTAAAAAAGTAAAAAACAAATTCAAAAAAAAGTAAAAAAAGTATTTTTTGGTGTCAAGAATACTTCTTTAATCAAAAACATGAATTTTTGTTTGTGAA…
92	rps8		171180	171590	411	0.2895	L	136	ATG	TAA		532	AAAGTTTTTTTGAATAGATGCTTAAATTCATTTATAATTCAATCTTTAAGAATTTTTTAAAATTCTTTAAAAAAAAGTTAACGTTACTTTTGTGAAAAAAATTTATAGCTTTAAAAAGCTATAAAAAGAGTTGAAGAACGTTCTTTACTTATTCTTTCAATAAGTTTTTTTTTACTTTTCTTTTTTTTTAGATTCAAGAAAAAGAATCAGCACAAAAAAAGAGGTAGTTGTTTTTTGTTGAGCTCAAAAAAAGAAAAGTTTTTTATTTTTTACAAAAAAATGGAAGCAAATGGTTTGCTTTGTTTTTCAAAGTTAAGAACAAAAGTATTGATTTTATTCTGTTTTTGAAAACACTCAAAAAATTGGTATGTTTTTGAACACACTCATTTTTTGAGTGTG…
93	rpl5		172123	172665	543	0.3039	L	180	ATG	TAA		497	AAAATTGAATAAATTTTCACATCTGAATAAATTAGACTTATCAAACCTTTAAAAACAAATCATTAAAAGTTTTTCTCTTTGCTTGTTTGACTTTTGTCTTCTTTTTTTAGTGAAATACATATTTAAAGATTTCCATTTTTTTGTCTTTGACTGTACAATTTTTTGTTTCCTAGTTAAACACTGAACACGCTTTTCTTCTTTGTTTTGAATACAACAAAAACGTAAAGTTTAAAAAAATGGATAAAAGTATTGACTCTGTGAAGTGAACTTTGTTGATTTGAAAAAAAGTCAAAACAAAATTTCCGAAAAATGAATAAAAATTTTTTGCAACGAGAAAATTCATTTCTGTTTTTAAAGAACTTGAAAGGGTTCAAGATGAAAAAAGGTATGACAAAAAAA…
94	rpl14		173163	173528	366	0.3607	L	121	ATG	TAA		79	AAAATTTTGATTATTTTATTTTTTATTTTCATCAAAAAAGCTTTTTGAACATGCAAAAGCCAATCATTCAAAAAGCTTT
95	rpl16		173608	174024	417	0.3669	L	138	ATG	TAA		850	TTAAAAAAATTTTTGAGTTCTTTCACAAAAATCTCTTCTTTCTTTTTTATGAAAATCAAAAACCTTTGCTTTGTTTTTTCTTACACAAAAGAAAGCTTTTTTCTAAAATTTAGCTATAATTGGCTCTTTTTTTTTGTTTAAAAAAAAGTTTTTTTTGCCTACAATTTGGTGACAGGCAACAAACTTTTTGTTATTAACAGAAAGTTACAACAAACTTTGTTTGTTGTTTGCATAACAAAAGAGCTTTTACATTTTTCTTTAAATGAACAATGCTACCTAAAATGAGTATCACAGTGAATAATTTACACTTCGTTGATTAAAAAAAAAATGAAAGTCTACTACTAAAAGACAAAAAAAAACAAACTCGCTCAAAGGAACAATTCTTATTGTGTCAAAAAA…
96	tRNA-Cys	C	174875	174946	72	0.5556	L				GCA	615	CTTATAAATTTTTTCTACAACTTGGGTCTGCTTTTACAGCAGCAGCAATCCTTGATTGCAGAAATTTTCCAAAAGGAATGAAAAAAGAATTTTTTAAGGAAAATACAAAACTAAAAAATTCTAAAAAACTGAACGATCAATTCAAAATCTCAATAGAAAAATAAGGAAATATGTTTTTTGAGAAAAAGTTTTTTCATTTATTTTACCAAAAAAAAACAAAAGAATCTATATTTCAAAATAAAAAAGAATTTTGTTTTTGATTTTCTTTAATTTATTCTTAACTTTTTTTATTTGTTTTTAAGTGTTTTTTCTTTAAAGAAAATAAAGAAATACCAAAAACTCTTTAGCTTTTTTTTAGTTTTTTATGTTCTTTTTCAATAGAGGAAACCTATAAAAAAA…
97	ycf1		175562	182749	7188	0.2962	L	2395	ATG	TAA		1165	ATTATAAAGTTTCTATTTTTCTGTACTTCATTTTACAGAAATTTCCTGTATTTATCTTTTTGTTGTTTTCCAACAAAAAGTGTAGGCAAAAAAGAATTTTTCTTGCGAGTTTGATTTTACCAAGAATAAACCTACTTGTAAATAAAAAGAGATTCAAAACAAATATTGGAATATTTGTTTTTGTTTTTTTCAATGAAATGAAGTCAATCAGCTTTCATTTTTTATAAATTCTTTTATTGAAAATAAAAAATATTTTTTTTATAAAAAAAAATTTATAAAAATATTATAGAATTGAAAATTCTTTTTTCAAAAAAAAGAATGTTTCTTGAAATTAATTTTCATTGAAAATTGAAATGAAATACTTTTATTTTTCTGAAAAAACTTTTGAAAAAAGTTTAA…
98	tRNA-Ser	S	183915	184004	90	0.5333	L				GCT	810	ATTTCCTTTTGTCTTTTTTGCAACGGAAGCAAAGTTTCCAGTTGTTTTGTGGCTCCTTTTTTTTTTCATTCTTTTTTTTAGGTCAACACTCTTTGTTTTGACCCGAGTATTTGAAAAAACAAAAAAAGAAGGAGGAAACACAGTGGAAAGGGGTCATCAAAAAAACTTTTTGCAGCGCAAACTTTGTTTGCAGCAGCTTTCTGCAAATGCAGAAAGTTCTTTTTTTTGTGTTTTCATACTTAGTGCCTGTATTACAGGCACTTGGTATGAAAACACAAAAAAAAGAGGCGCAAACTCTGTTTGCAGTTTTTACCTTTTGGTAAAAACCAAAAGGCAGCTTTCTGCAAATGCAGAAAGTTCTTTTTTTTTTGCATTCAACCTTCGTGATCTATACAACAG…
99	rrn5S		184815	184939	125	0.472	H					63	CAGCGGAGCAAAGCTCCGGAGGTTTTTCATTTTTTTACCAAAAGGTAAAAAAAGTAAACATAG
100	rrn23S		185003	185969	3018	0.4877	L					225	CCTAAAAAAACGAAATATCTTCACCAAAAAGCTGCAACAAACAAAGTCGAAGCAAACCTTTGTTTTCCCTCTCGAAAAAGAGAAAAAAGATCAATCACTCCCACTCTCTTGTTCTGTTCACTCTTTCTTTCTGGGCAAAGGGCCAAGGGCACCTTTTTGCAAAGATAGAAATAACCAAAAGGTCAAAACAATGAAAAAATGAAAACAAAAAAATGAATGGAAGGG
			186908	188958
101	tRNA-Ala	A	189184	189256	73	0.5068	L				TGC	40	AATTTATGGTTTTTTTGATTGAAACTCGTTGAAAACAAGC
102	tRNA-Ile	I	189297	189371	75	0.5067	L				GAT	135	GGTATTGAATGCTCTCTTTCAAAGAGAGAGAGAGCATTCAATATTGAAAGGATTTAAGCAATCCATTTTTTGCTTCGTCTTTTCTTTTGTTTTGACCTTTTGGAAAAAAGGCAAAAAGCTGAAAAAGATGAAAAT
103	rrn16S		189507	191004	1498	0.5093	L					1469	GAATTGGCGTGGCTATTGTTAAATATTCACGAAGAATTTTTGCAGATTGATTTGTCAAATCTTCAGGAAGATTATTGACTGAAAAATCTATGGTATTTGTGGCATTCAAATTTTTCATTTGATCAGAAAATAACAAGTCATCGGCTAATAGTTCTTCATGAATGATCGATGTGTTAAAAATTTGTGAATTTTTGACATTTTTATATTCATTGTATAAAGGTTGATCAAATTTTAATACATTATTATCATTCAAACTTGGAGTAATATTAAATAAATGACGAATTTTTTTCAATGTTCCTACAAATTGTTGATTATAAGCTCGACTAGTTAAACTCTTTGTACCTCCGATTTGATTTTTCATAGTACTATAATGTTGCATATATGTGTACCATCTGAATG…
Explanation of results: *The seventh column: the calculation of GC content in GC_Percent does not include intron sequences; *The eighth column (Strand): H (Heavy strand) stands for heavy chain, L (Light strand) stands for light chain. *The penultimate column (Intergenic nucleotides): A positive number indicates that there are intergenic sequences, and a negative number indicates that there is ove…

## Sheet: TableS2summary of Bases content
Strand	Light strand				Heavy strand
Base	A	T	G	C	A	T	G	C
Total	68590	69290	29669	29260	69290	68590	29260	29669
Percent	0.3485	0.3521	0.1508	0.1487	0.3521	0.3485	0.1487	0.1508
