# Supplementary material for: Structure and Phylogeny of Chloroplast and Mitochondrial Genomes of a Chlorophycean Algae Pectinodesmus pectinatus (Scenedesmaceae, Sphaeropleales)
Source: Life (Basel). 2022 Nov 17;12(11):1912. doi: 10.3390/life12111912 (PMC9698225; doi:10.3390/life12111912)
Supplement: Supplementary file 1 [file life-12-01912-s001.zip › Table S3.xls]

## Sheet: TableS3 summary of Gene feature
NO.	Gene/element	OneLetterCode	From	To	Size	GC_Percent	Codetype	No. of AA	InferredInitiationCoden	InferredTermination	Anti-Coden	InterveningSequence	IntergenicNucleotides
1	cox1		1	264	1611	0.4513	H	536	ATG	TCA		667	CTTCGGGTGTGAGCGATTTCAACCCTAAGGGTGTTTCTTAACCTTTTATTTATACTGAATTTTTATTTTTTAATTTTATAATGTTTTTTTTATTGAATTAAAAGCTTTCTTTGACAAACTACAAACTGAGCCGAGGTCTTCAAACCGACAGAGCCCATAAAGGGAATTCACAAAAAAACTTTTAAGCTATTTTTTTATAGTCTAAAAATGCTTTTTTAAAAATCCATATGGTTTTACCCTAAAAATATATTTTGATATATAATCTTGTAGGTTTAAAATGCAAAATAAAGGTATTTTAAAGCTCCTTTCTGGACTAAAAATGAGAATTTAGAAAGCATTGGCACGCTTATAACTATATTTAAAAAACGAGTAAAATGAAAGGTTCACTTTTAACCTAGA…
			930	2276
2	cox2		2944	3393	450	0.4111	H	149	ATG	TCA		64	ACTAGCTATCTTATTGCTGCGGGATAAGCAGCTCCCAGGAGAAGCAAAGCTTCTCTGGGGAGCT
3	tRNA-Tyr	Y	3458	3529	72	0.6528	H				ATA	1363	GCAAAGCTGCTCTCCAGGAGAAACATGTTTCTCTGGGGAGCGGAGCTCTCCAGGTACCAGCAATAAATTGCATTCCTCATTGGACTACAATTGCTGAGTTACAGAAGAAAGCTCTTTGGCTTCTTTATTTTTCATTTTTATTTTTTTTTACAGAAAAAGCTATAAATCCATTTGGTGAACATTAACAAACAGTTTTGCTGTACTAATAATCAAGTCATCAGTGATTGCTAGCACATTTTTGCGTTGCAAAAGGATAGAATAAGAATTTCTAAAAAAATATAGAAATTTAAAGACATAGATTAAGAACAATACAAAAAAATGGTTGACTTCAATCGATAAAGGTTCAAGTCCTCCTGTACTCTTTTAATTTTGTAAAAAGCACATATATATGCTTTAAAA…
4	nad2		4893	6563	1671	0.4153	H	556	ATG	TCA		149	ATTCATTATTTGTTTTTTTTTTTTATTTAAACGCATCAATCCCTGGGTAGCGAAGCAACCCAGAAAAGCCTCGCACTCACAGCGTAGGATCTGCCCCGGATTCAGGTAGCGTATCTGCCTTTCTGAACAAACAATAGAAGAATAAAAGA
5	nad5		6713	8674	1962	0.4358	H	653	ATG	TCA		432	AAACAATAAATAGAATTTTTAAAATTATATTATTTTACATCTACACTGGCGAGAGTTTCGACTTCTGTCGCTTTTATGGCTTGGAGAAGAATTCCCCTCAAGTCTTCAGACGAGCGTTAGCCCTTCCTCGGTGTGGAGGGGCTGTTTCGCAAAAAGTCAATGTATTTATTTTTTTCTATAGAGATTATCTTTATGTATACAAAAATAAATAAAAAATTTATTCTTTTACAATAAAACATTAGAACAAAAAAGATTAAAAAAAAAGAAAGTGTTCAAATCCTTACGTATTCTTCTACTTTCTAAATTTTAAGGTATTGTATAATAAAGATAAAGGCGTTAAAAAAAGCTTATTTCGTATCCTGAAGCATCACAGGTTTGTTTCAATCCCACATAAAATTG…
6	nad4L		9107	9409	303	0.4389	H	100	ATG	TCA		236	AATGAAATTGGGAGGGGCTGCTAGAGGGCTCTGCCCTCTGGGGAGCAGCATAGCTGCTCTTAAGGAGGACTAAAGTTTTTCTCCACCCACCGTTTACCTTCCCTATTAAAGCCTTTTGAATGGCTTTCTATTATGAATACAAAATATTTTTTTTCTAAAGCAATAACTAAAAAAGTAGTTCCAAGTGAGTTACGTTACCAACGTAGGGCCCCACCTAAACTCTGTTTTTAAAGTTC
7	tRNA-Phe	F	9646	9717	72	0.4444	H				GAA	6	ATTCTT
8	tRNA-Glu	E	9724	9797	74	0.4054	H				TTC	1271	ATTAATAATATTTTTCAAAAAAAAAATCTCTTTCATTTGATTGCTTTTATGAGTCATAAAACAAAAAAACTTTCTCCATTTAAATACAAAGGTAGGGGATTGCTTTTGTACCAAAATCTATGGCATTTGCCTAAACTCACAAAAAAACAACTCCGATGGTCTAAATCTAAAGCAAAAGTACGTTCTGCGGAATAGGGGCGTTCTATGTTTAAATATCGCGCTCTTAAAACAATTAGTCCATTTTGGGTGTAGAATACTAAAGCAAAAAAGAAGAATAGCACTTTTTACAATTAGACTCCAAAAACAACAACTGGGAAAAGCGCTAGTAGTTTTGAGTTTTTGGGGAAACAAAACTTCGCTCAAAGCGCGAAGCACACCAAGATGCATGTTCCCGTACTA…
9	tRNA-Gln	Q	11069	11140	72	0.5833	H				TTG	945	AATTAATATTTTCTTGTTATAACAAATTCTCTCTTTTTGAAAAAAGATAAATGGCACGTATAAATAATCCACGCAATCTACGTTCTTCTTTGTGGTCTAATCCAACGTTTTGTTTGTATTGTGAAAAAAAAGAAGGGATTCCAACATGGACTAAAAGGCTACAGTCTACTAATTCTACACTTTCTTTCTAGAATAAAATTTACTAGAAAAAAAAGAAAAATAAGAAAAAAAATTCTAGTCTTTAGAAATAGGCCCGTATTGTTGTTTTGTGTTCTTCTTATAGCTACACTATTAATCCCTTGTTGTCTAAAGCAGCAACAATGCAAGTGATCTTTAAACTAAACAAGCTATAGGCTAAAAAAACCCGCACAATGCGCGGGGAACGAAGCAAATTTAAAG…
10	tRNA-Ser	S	12086	12167	82	0.4756	H				GGA	148	GATCCGTGAATTTTAGACTTCATAAAAAATGAAGCTTATCTTATAAAAAATATTCTTTAATAGAAGAATATAATATAATTATATAATTTTTCCATTTTTAATAAAGAGAGGGAAGAATAGAACGAAAATTAAAAAATGAAATCTATAA
11	tRNA-Leu	L	12316	12394	79	0.3291	H				TAA	131	ACCTAAGGACATGCTGGTCGCCTTAGTGATCATAACGCTTAACGTTGTTTTACTGGACTTAGGTTTTACCAAGGGGCTCTAGCCCCTTTAATCCCAAGACTGAACCCCTCGGGCCTATAGTGCCCGGAATT
12	tRNA-Asp	D	12526	12599	74	0.5811	H				GTC	251	AATTCTTTTCATTTATAATTTTTGTTTTTTTTAATAATTAAAAAGTGGGTATGATCTTGGCCCTGCTCGAACGCGTGCAGAATGTTTAACACATGCAAGTCTTTCTATGCTTGTTTTTAATTCTAAAAAAAAAATAAATACATAGAAGGCGTACGGGTGCGTAGAAACTGAATTTTCCGTTGGTGTAGCTAAAAAGCACCCAAAATAGTATAGGGTAAAAACCTAAAATAAAATTTATGCGAAAATTTAGT
13	rns1		12851	13631	781	0.4366	H					182	AACGTCTAAAACCTTACCAATATTTGCATGTAGATTTTCCAAAGGTTAGCAATACTATGCGCTTGGTGCAAAAATAGTACACGTTTTTTGCATTCTATAGCATAGCTGCTTTTATGCCTTTAATGCTTTATTTTTTAATTACAAGTTCACCAAACCAGATGAGCTCTATAATCTTCTTTTTT
14	rnl2		13814	14367	554	0.4675	H					336	TTACTAATATCATCTTTTAAGTAGAATATTTTAATATATACAAAGAGCACAAGAAACCTCAAAAATTTCTGGGGTATTATCACCCATTTTAATGGGTATTTTTTTTTACCGATTTTATTTAGGCAGAACATTTAATAAAAAGTCTTTTTATGTGTTAAAACGTAAAATGAAACTATACCAATCTTTGGAACTTTAGCGCTTTTTATACCAGACCTAGTGCCAGTGCGTGTGAATCCTGGTTTGGACTGCACTATTTTATTCTTGGAGAGCTCCGCTCCCTAGATGGCTTTAGCCATCATCGAACTTAGCTTTCACCTACACTGGAGCAGTTTCGCT
15	rns2		14704	15532	829	0.3945	H					24	AAGAGTAGAATGTAATAAATTTTT
16	tRNA-Met	M	15557	15627	71	0.493	H				CAT	434	ATTCCTATAATATTATACCATTACAATATTAATGCCTCGTAAAACTCTAAAATGACTCTGGCTTTAAAGAAATGTAAGCTATTAGAGTAATTTGTAGTCCTTAAGTGCCGCTATATTAAGTGGTTTTTTACAGACGATTGTTTTGAATCTGTTTTGCTGCGGTCATGTTGAGATTCAGTAATACACTGTTAAGTTAAAGAATAAAAAAGGAAATTCAAAAAAAACGTACAAATAAATACACTATTATGTCAAGGAATTGAATAACTTTTAAGTTTACCCACATACAGTAGATAGGTAAAATAATCACAGAGCTCTATATTATAAACAACTATACTTCAATTATATGTGAGCATAAAAGCAACGGTTTTAATGTTTGTTGCCTTTATTTTGAATTTTTGA…
17	atp6		16062	16976	915	0.4372	H	304	ATG	TCA		606	AACTCACTCTAGGTTCAGGGCAGCTTCGATTTTTAAAAGCACCTTAGTCGGAAAGTCAATGTACAGCTTTTTGCTGCTCTGGTCACTACGTGACCGGTTGATAAAGTACACTTGGGTTAAACTCACGCATTTATGCTAATTGTGTACTACTATCTGTATAAAGGCTTTTTCACTTTTTGTTTTGCAAAAAGAGGTAAAAAAATTTAAACTATATTCTATATTCTTTTTATTGTTCAGTTCCTAATAAAAGAGCCTTAATGTTTAACCTACTGTGGGAGCGGAACTGAAGCCCAAAGATGGATTAGGCCAGGGAGACTTATCTTCACGAAAAACATTCATTCTTATTTTTTGGTTTATGAAATGAATACGCTGACTACCAACAGTTTAAATTCTAGTATA…
18	nad1		17583	18557	975	0.439	L	324	ATG	TCA		742	ATTCTTTTAATATTCGTCAAAAGTCTCAAGACTGTCAATAAAGCTTCACAGAGGACTAGCACAGCTGTATGGACTTTGTTTGCCCTGAAACTTATTTTATCTATAAAAGCTTCTGCTCAGGAAAAAACACCAACCCAAAAAACTTTGCAACCTCAAGTATTACCTCACAAAAAAGTTCAGTCCCTAAATACAACGACAACTACAGGAAGTACCAATTTTTCTTGGGCAGTCGTGAATGATTTTTGTGTATCAAAAGAAATTAGTGCGCAGTTTTGTATATTTGTGAAGGCACTAGGAACTCTTTTTAAAATGACACCGTGCACTTAATTGAAATTCGTTTTAGAATTTACAATTCGTTTTTTTATATTCTTTTATAAGATTGCATTTTAATGCATATAG…
19	tRNA-Leu	L	19300	19384	85	0.5059	H				CAA	641	TTTTTTATTATTATTTCAGTACGCTTTTATTTAAAATATGTGTCAAATTGGTGAAGCGTAAGCTCTAGAAGGTTGCAATACCCCAGCACACTAAAACTGTTCTGAGGACCTATTTCTTTTGTAATGGATAAATAAAAATAAATAAATAGAGGGGGAACCAAGTTGCACACTACCTGCACAGAGGGTTTATCCCCTAGAGATGCTTCCCCTCAGAGGCTCTTCTGGGGTTGCTAAACACCGTTATTCCCATAAAGCAGCATAGCTGCACTTTATGATGCTTTCAAGGAGGAACTCCAATGAGTGCGCTAAGTAGACTGAGGGATTTCAGTCAATGCCCCTTGTTTCAAACTCACCCAAATGGAAACAAAAGGAATCAAGCTCAACTAAGTAGTCCAAATT…
20	tRNA-Cys	C	20026	20097	72	0.4167	H				GCA	223	ATGGAATAGACACGCTTGGGTAATGATTCTCCCTCAAGTATACGGTTCTTCTTATCGGTAAAGATAATACTTTTTACCCCTATAGAAAAAAGAGCACATAAGGACTTGAACTGTTTATATAAACTTTCAGACCTATTTTAGATAAACTGTATGAACGATTAGAAAATTTTAAATAAATAATAGAAAAATATAGATCTCTTTAAAAAAAAATAAAAAATTTAAA
21	cox3		20321	21133	813	0.4551	L	270	ATG	TCA		450	AATACAAAACCTAGTCTAAACAGGCCAGGGACTGGGGTCTACCAAATGGTACCCATGGTGGGGCCTAGCTCCGTGCCTAGAAGTACTCTACTTTTGCTTAGAAGAGTTCTATTTCAACGCAGTGTTCTGTTGCCCAGCAGCAACTTGAACAATTTTTTCTTGAGTGTTAAACAAAGCCATTGTTTTGAATAAAATATAAAATACAAAAGTTTAGCGCAGCAGTGCTACACTAAATAGGTAGAGCAACGCCCCTGAACACTAAAGTACTCGGGGACACTTGCAGCATGCGAGAGTACCCTACTAAAGACAGCCAAGCCAAAGGCTCTGCCTTCTGGTGGTACCCTGAGGCAGCGCTGCTGCCTCAGAAGGAATTAAATCTTCTAAGGCTTCGAACTAGAG…
22	nad3		21584	21937	354	0.4209	L	117	ATG	TCA		47	TTCTTACTTAGCTCAACTGAAAAGCGGTTTTGTTGCTTTTGGCGCGT
23	tRNA-Ile	I	21985	22056	72	0.4722	H				GAT	106	TGTTTTATATGTTGGTTTTTGCGAAATAAAAGAATTCTATTTTTTAAAATAGAGAAAACTAAAGTTAAAAAATACTAAAGCAAAATTTGATTATATGTGCATGGGC
24	tRNA-Arg	R	22163	22233	71	0.3521	H				CCT	99	TTTTTTGTATAGCTTACAAAACACGAGCTAGAGTGTTAGCGCTTTGGGTTATTTAACCCTCCTCTCTTATTTAAGTAAGCGTTGTGCAAAGAATTCTTT
25	tRNA-Leu	L	22333	22414	82	0.4512	H				AAG	70	TTGACTAATCCAGCGCTTGTTAGATGGATTCTATACACTTGGTTTAGGGTTTAGTCTATAAAAAAAAAAT
26	tRNA-Tyr	Y	22485	22567	83	0.5181	H				GTA	23	GGGATTCAGTCCCCGTAGAAATT
27	tRNA-Ser	S	22591	22678	88	0.4659	H				GCT	366	TGAAGAGCAGCTTTGCTGCTCCCCAGATGGCCAAAGGCCATCCTGGAGCCGCTACGCAGCCCCAGAGGGCAGAGCCCTCCTGGAGAGCAGCACAGCTGCTCCCCAGAGAAACAAAGTTTCTCCTGGGAACATCCGTTCCCAGTGTGCTAAAGCACACCTGGTGCTGACGCACCAGAGCTATCGCTCCTGTTCAAATTTTGAATTAAATAAATTTAGTATTAACCCAGATCAAAGGGCGACAGCCCGTTGTTATCTAGGTGGGACATATCCCCTCGGTAAGCTTTCCTTACTGAGTGTTTTGGAACCCTGGAGAGCAGCTATGCTGCTCCCCAGATGGCTTTGGCCATACTGGACTAAAGCTTAGTT
28	atp9		23045	23266	222	0.4324	L	73	ATG	TCA		43	AATGCTTTTTTTAATTTAGAAACTCCCTGCCTAACTTCCTGTA
29	tRNA-Pro	P	23310	23382	73	0.5479	H				AGG	84	TAAAATGGCTACGTGTTGCTTGGATTAAATCTATCTGTATTTTTCAAACTAATCTTTTTAGAATTCAAAAAACAACTATTGAAA
30	tRNA-Leu	L	23467	23551	85	0.4353	H				CAG	175	CATATTCGCCATTTGCTAAACTGAGATTTTGGGGCGCGGAGCGGAATGTCGTTTTTATTGTAGCTCGATGAAAAAAAGAATAGAAAATAAATTAGAACAATAAAGGGGGAGCAAAGCTCTTAAATAGCGAAGCAACCCAGAGAAGCTTTGCAGAGGGTATAAGCCCCGAAATTTA
31	cob		23727	24938	1212	0.4373	L	403	ATG	TCA		85	TAGAAAAAAATAGAGATATAAATAATGTGGGAAGAACGGAGCGGTAGCGAAGCAGCCCAGAGTCTTCAACAAATGCCCGAAAGAG
32	nad6		25024	25704	681	0.4258	L	226	ATG	TCA		86	TATGGTCACACTTAGCTCTCCAAATTTGGCAATGGGCTCAAGGACTAGAAGGAAAGGAGAAGCTGCTCACTGGGTAAGATGCCTTT
33	tRNA-Lys	K	25791	25863	73	0.5342	H				TTT	83	CAGGGCACTTTAGCGCTCAGCGCGCTATCGCGCCCTTGCTATAAAAATAAAAATAGATTATATTGCGGCAACAGTTTAAAAGT
34	tRNA-Met	M	25947	26018	72	0.4583	H				CAT	35	GTAAAAACTATTATATATTTTGAAATTCCATCGAA
35	tRNA-Arg	R	26054	26127	74	0.4865	H				ACG	147	TTTGTGATTAGTTACAAAAAACTGTGGGATTTCTTTTTGTTATTCGCGCCAGCCTACATGGTTCTACGCACCCAGGTTTTGATGCTATGCGCTTCAGACGTCCCGCTAAGCTGTCAAGAAAATTTAAAAGAAGAAATTATAAAAAGT
36	tRNA-Asn	N	26275	26348	74	0.5405	H				GTT	82	ATAATATAAATTTTAATAGAAAAACACACTCGTTTTAAAATTATTTCCCTAATGGCCACATTGGTGACCCAGGGGTCATTAC
37	rnl3		26431	26760	330	0.3909	L					87	AACAAAAAACTGGACGGTTGGCTACCTAGCATCTTTATTAAAAAAAATATTCTATTTTTTGCTTTAAACTTTAATAAAGTATAAAGT
38	tRNA-His	H	26848	26920	73	0.5068	H				GTG	74	CAGAAAAGAAAAAAGAAATAATTAAAATTTGTTGTTTTTTCGTATACTCTTGCACACTTTGTTCTAAAAGTTAA
39	rnl4		26995	28525	1531	0.4147	L					210	ATATTCTGCTATGCCACCTGTGTTGGATTGTATACGGCAAACTGCCTTTTTTGAAGCAGAAAATAAAAACTTCTACAGTTTTTTAGAATAAATATTTTATTCTTTATTTAAACCTGCTTTCAATAAGATGTTTTCCTGGCCATATTAGATGGAAAAAACTGTGTTTTTAAAAACGAAAAGTGCATTGGCCGCACTTCGTGCATTCTATTT
40	tRNA-Ala	A	28736	28808	73	0.4932	H				TGC	612	CCCCAGATGACTAAAGTCATCCTAGGCCCAAGATATCTAAAAGATATCTAAAAGATATCATGTTTCTAAAAAAATAAAATTAAAAGCGCCTACGCTTACTAGCTTAAGCAGAGCAGTGATCAAAGACTCGCTCACTCATGTTGCAAAAGGCACACAGTTACTCTATTAGAAACCAAAAGATCCAAAATATAGCTTGGTTTTATAATTTCAAAAGAGCACACTGCTGTTCAGAAGCACGGAGTTTCAGTACTATTTCACAGGACAACAGTGGTCCATCTTTTTCACCTTTCTCTCACGATACTCGTGCACTATCTATCACACAGCTTTTATCAATAAGGAGGGTGGTTCCCCCACTTTTGCTTAGATTAAGCAAAAGAAAATAAATTTTTACAATAAATA…
41	rnl1		29421	29705	285	0.4	L					20	TCTTAAAAAAAATAAAAGAA
42	tRNA-Gly	G	29726	29797	72	0.4861	H				TCC	49	TTCAAAAAGAATGTGCAAAAACGAACAAAATCCAAATGGACGTAAACTC
43	tRNA-Trp	W	29847	29917	71	0.507	H				CCA	23	TATCGAAAATTTATTATTTTGAT
44	tRNA-Val	V	29941	30012	72	0.4722	H				TAC	266	TTCGTTTTTCTATTTATTTTTTCTTTTTTTTTAATATCTCTTAAAATGTTCTAAAATATATTTTTAATGTTTTAAAAAAGTATAAGTAAAAAATTTAAAACTGGGCACGAGGGGAGAAAGCTCTGGTGCCTTTCAGGCACCAGGATGGCCTTGACCGTCTGGGGAGGCGTAGCCGCTCCAGGTGTGCTTTAGCACACTGGGAACGAATGTTCCCAGGAGAAGCTTTGCTTCTCTGGGGAGCAGCTGTGCTGCTCTCCAGGAGGACT
45	tRNA-Lys	K	30279	30356	78	0.6282	H				TTT	46	TAAAGTCATCTGGGTACTGCGTACCCAGGCCAAAAAAGCCTTAAAG
46	nad4		30403	31968	1566	0.4278	L	521	ATG	TCA		227	TCTTGAAAGATTTCTTGTGCACAGCCTTACTCCTTGTTAAATAAAATACCCCAAGAACCTGTCCTTACAAACCTAGCGCAAACTGAAAATGCCTGAGTCCTAAAACTGGTGCCTTGGCTACTGATATACAAGTGCATAGCATTTGGAGCAATTCAGTGACTCAAACTGTTTTGAGGCTTAGCTTTTACAACAATTTTTTGAGTTAAAGGACAATCCTTTATTCTTCT
Explanation of results: *GC_Percent in the cox1 line refers to the GC content of the cox1 coding area; *The seventh column (Strand): H (Heavy strand) stands for heavy chain, L (Light strand) stands for light chain. *Last example (Intergenic nucleotides): A positive number means that there is a sequence of intergenic nucleotides, and a negative number means that there is overlap between adjacent g…

## Sheet: TableS3summary of Bases content
Strand	Light strand				Heavy strand
Base	A	T	G	C	A	T	G	C
Total	9499	9567	6502	6627	9567	9499	6627	6502
Percent	0.295	0.2972	0.202	0.2058	0.2972	0.295	0.2058	0.202
