# Supplementary material for: Structure and Phylogeny of Chloroplast and Mitochondrial Genomes of a Chlorophycean Algae Pectinodesmus pectinatus (Scenedesmaceae, Sphaeropleales)
Source: Life (Basel). 2022 Nov 17;12(11):1912. doi: 10.3390/life12111912 (PMC9698225; doi:10.3390/life12111912)
Supplement: Supplementary file 1 [file life-12-01912-s001.zip › Table S4.xlsx]

## Sheet: Table S4
Table S4 Chloroplast SSR of P.pectinatus
# CpSSR ID	Repeat motif	Size(bp)	Start	End	Region	Annotation
1	(A)10	14340	14349	10	IGS
2	(T)10	14662	14671	10	IGS
3	(T)11	27674	27684	11	IGS
4	(A)10	28376	28385	10	IGS
5	(T)11	30539	30549	11	IGS
6	(A)10	30755	30764	10	IGS
7	(T)10	31637	31646	10	IGS
8	(T)10	32936	32945	10	CDS	rpoBb
9	(A)10	39437	39446	10	IGS
10	(A)10	42655	42664	10	IGS
11	(A)10	44392	44401	10	IGS
12	(A)10	45556	45565	10	IGS
13	(A)11	48149	48159	11	IGS
14	(T)10	51027	51036	10	IGS
15	(A)10	51410	51419	10	IGS
16	(T)10	54835	54844	10	intron	psaA
17	(A)10	57542	57551	10	IGS
18	(T)10	61762	61771	10	IGS
19	(T)11	62645	62655	11	IGS
20	(A)11	62906	62916	11	IGS
21	(A)10	67163	67172	10	IGS
22	(T)10	67984	67993	10	IGS
23	(A)10	69621	69630	10	IGS
24	(T)10	71827	71836	10	IGS
25	(T)10	72286	72295	10	IGS
26	(T)10	77576	77585	10	intron	rbcL
27	(A)11	93637	93647	11	intron	psbA
28	(A)10	96357	96366	10	IGS
29	(A)13	98752	98764	13	IGS
30	(A)10	99147	99156	10	IGS
31	(T)10	104582	104591	10	IGS
32	(CT)6	106561	106572	12	IGS
33	(A)11	109156	109166	11	intron	rrn23S
34	(A)10	111896	111905	10	IGS
35	(T)10	112134	112143	10	IGS
36	(A)10	112550	112559	10	IGS
37	(A)10	115219	115228	10	intron	cemA
38	(A)11	115978	115988	11	IGS
39	(A)10	118328	118337	10	IGS
40	(A)10	119478	119487	10	IGS
41	(T)10	122152	122161	10	IGS
42	(T)10	124428	124437	10	IGS
43	(A)10	126435	126444	10	CDS	clpP
44	(A)10	128608	128617	10	IGS
45	(T)10	132259	132268	10	CDS	rpoC1
46	(T)13	133687	133699	13	IGS
47	(T)11	134268	134278	11	IGS
48	(A)10	134790	134799	10	IGS
49	(A)10	138092	138101	10	IGS
50	(T)10	138516	138525	10	IGS
51	(A)10	140214	140223	10	IGS
52	(A)10	140921	140930	10	IGS
53	(T)10	146433	146442	10	IGS
54	(A)11	146604	146614	11	IGS
55	(T)10	151785	151794	10	IGS
56	(A)11	153503	153513	11	IGS
57	(A)12	154568	154579	12	IGS
58	(T)10	157356	157365	10	IGS
59	(A)10	158536	158545	10	IGS
60	(T)10	161115	161124	10	IGS
61	(T)10	161531	161540	10	IGS
62	(A)10	162677	162686	10	IGS
63	(T)10	169939	169948	10	IGS
64	(T)10	170774	170783	10	IGS
65	(A)10	174343	174352	10	IGS
66	(A)10	174835	174844	10	IGS
67	(T)10	175400	175409	10	IGS
68	(T)10	183407	183416	10	IGS
69	(A)10	183823	183832	10	IGS
70	(T)10	184061	184070	10	IGS
71	(T)11	186800	186810	11	intron	rrn23S
72	(AG)6	189394	189405	12	IGS
73	(A)10	191375	191384	10	IGS
